# Supplementary material for: Assessing the accuracy of health facility typology in representing the availability of health services: a case study in Mali
Source: PubMed Central journal article supplement — BMJ Open. 2024 Mar 21;14(3):e077127. doi: 10.1136/bmjopen-2023-077127 (PMC10961534; doi:10.1136/bmjopen-2023-077127), 2024-03-21

# BMJ Open

BMJ Open is committed to open peer review. As part of this commitment we make the peer review history of every article we publish publicly available.

When an article is published we post the peer reviewers' comments and the authors' responses online. We also post the versions of the paper that were used during peer review. These are the versions that the peer review comments apply to.

The versions of the paper that follow are the versions that were submitted during the peer review process. They are not the versions of record or the final published versions. They should not be cited or distributed as the published version of this manuscript.

BMJ Open is an open access journal and the full, final, typeset and author-corrected version of record of the manuscript is available on our site with no access controls, subscription charges or pay-per-view fees (<http://bmjopen.bmj.com>).

If you have any questions on BMJ Open's open peer review process please email [info.bmjopen@bmj.com](mailto:info.bmjopen@bmj.com)

# BMJ Open

## Health facility typology, a misleading proxy of health service availability: a case-study in Mali

|                               |                                                                                                                                                                                                                                                                                                                                                                                                                                                                                                                                                                                                                                                                                                                                                                                                                                                                                                                                                                                                                                                                                                                                                                                |
|-------------------------------|--------------------------------------------------------------------------------------------------------------------------------------------------------------------------------------------------------------------------------------------------------------------------------------------------------------------------------------------------------------------------------------------------------------------------------------------------------------------------------------------------------------------------------------------------------------------------------------------------------------------------------------------------------------------------------------------------------------------------------------------------------------------------------------------------------------------------------------------------------------------------------------------------------------------------------------------------------------------------------------------------------------------------------------------------------------------------------------------------------------------------------------------------------------------------------|
| Journal:                      | <i>BMJ Open</i>                                                                                                                                                                                                                                                                                                                                                                                                                                                                                                                                                                                                                                                                                                                                                                                                                                                                                                                                                                                                                                                                                                                                                                |
| Manuscript ID                 | bmjopen-2023-077127                                                                                                                                                                                                                                                                                                                                                                                                                                                                                                                                                                                                                                                                                                                                                                                                                                                                                                                                                                                                                                                                                                                                                            |
| Article Type:                 | Original research                                                                                                                                                                                                                                                                                                                                                                                                                                                                                                                                                                                                                                                                                                                                                                                                                                                                                                                                                                                                                                                                                                                                                              |
| Date Submitted by the Author: | 26-Jun-2023                                                                                                                                                                                                                                                                                                                                                                                                                                                                                                                                                                                                                                                                                                                                                                                                                                                                                                                                                                                                                                                                                                                                                                    |
| Complete List of Authors:     | <p>Petragallo, Samuel; World Health Organization, Health Resources and Services Availability Monitoring System (HeRAMS) Initiative</p> <p>Timoner, Pablo; University of Geneva, Geohealth group, Institute of Global Health; University of Geneva, Institute for Environmental Sciences</p> <p>Hierink, Fleur; University of Geneva, Geohealth group, Institute of Global Health; University of Geneva, Institute for Environmental Sciences</p> <p>Fuhrer, Caroline; World Health Organization, Health Resources and Services Availability Monitoring System (HeRAMS) Initiative</p> <p>Toure, Ousmane; World Health Organization Mali, Health Resources and Services Availability Monitoring System (HeRAMS) Initiative</p> <p>Iknane, Akory; University of Sciences, Technics and Technology</p> <p>Coulibaly, Youssouf; Ministry of Health and Social Development, General Directorate of Public Health and Hygiene of Ministry</p> <p>FALL , Ibrahima-Soce ; World Health Organization, Health Emergencies Program</p> <p>Ray, Nicolas; University of Geneva, Geohealth group, Institute of Global Health; University of Geneva, Institute for Environmental Sciences</p> |
| Keywords:                     | Health Services Accessibility, Health policy < HEALTH SERVICES ADMINISTRATION & MANAGEMENT, Organisation of health services < HEALTH SERVICES ADMINISTRATION & MANAGEMENT, Geographical mapping < TROPICAL MEDICINE                                                                                                                                                                                                                                                                                                                                                                                                                                                                                                                                                                                                                                                                                                                                                                                                                                                                                                                                                            |
|                               |                                                                                                                                                                                                                                                                                                                                                                                                                                                                                                                                                                                                                                                                                                                                                                                                                                                                                                                                                                                                                                                                                                                                                                                |

SCHOLARONE™  
Manuscripts

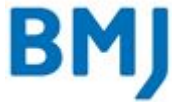

I, the Submitting Author has the right to grant and does grant on behalf of all authors of the Work (as defined in the below author licence), an exclusive licence and/or a non-exclusive licence for contributions from authors who are: i) UK Crown employees; ii) where BMJ has agreed a CC-BY licence shall apply, and/or iii) in accordance with the terms applicable for US Federal Government officers or employees acting as part of their official duties; on a worldwide, perpetual, irrevocable, royalty-free basis to BMJ Publishing Group Ltd ("BMJ") its licensees and where the relevant Journal is co-owned by BMJ to the co-owners of the Journal, to publish the Work in this journal and any other BMJ products and to exploit all rights, as set out in our [licence](#).

The Submitting Author accepts and understands that any supply made under these terms is made by BMJ to the Submitting Author unless you are acting as an employee on behalf of your employer or a postgraduate student of an affiliated institution which is paying any applicable article publishing charge ("APC") for Open Access articles. Where the Submitting Author wishes to make the Work available on an Open Access basis (and intends to pay the relevant APC), the terms of reuse of such Open Access shall be governed by a Creative Commons licence – details of these licences and which [Creative Commons](#) licence will apply to this Work are set out in our licence referred to above.

Other than as permitted in any relevant BMJ Author's Self Archiving Policies, I confirm this Work has not been accepted for publication elsewhere, is not being considered for publication elsewhere and does not duplicate material already published. I confirm all authors consent to publication of this Work and authorise the granting of this licence.

## Health facility typology, a misleading proxy of health service availability: a case-study in Mali

Samuel Petragallo\*<sup>1</sup> (petragallos@who.int), Pablo Timoner\*<sup>2,3</sup> (Pablo.Timoner@unige.ch), Fleur Hierink\*<sup>2,3</sup> (Fleur.Hierink@unige.ch), Caroline Fuhrer<sup>1</sup> (fuhrerc@who.int), Ousmane Toure<sup>4</sup> (toureo@who.int), Akory Iknane<sup>5</sup> (akoryagiknane@gmail.com), Youssouf Coulibaly<sup>6</sup> (youssoufcsseware@yahoo.fr), Ibrahima Socé Fall<sup>7</sup> (socef@who.int), Nicolas Ray<sup>2,3</sup> (Nicolas.Ray@unige.ch)

\* Contributed equally

Corresponding author: Fleur Hierink, (fleur.hierink@unige.ch)

1. Health Resources and Services Availability Monitoring System (HeRAMS) Initiative, World Health Organization Headquarters. Avenue Appia 20, 1211 Geneva, Switzerland.
2. GeoHealth group, Insitute of Global Health, Faculty of Medicine, University of Geneva. 9 Chemin des Mines, 1202 Geneva, Switzerland.
3. Institute for Environmental Sciences, University of Geneva. Boulevard Carl-Vogt 66, 1205 Geneva, Switzerland.
4. Health Resources and Services Availability Monitoring System (HeRAMS), World Health Organization, Quartier Ntomiboro- Bougou, B.P. 99, Bamako, Mali.
5. University of Sciences, Technics and Technology, J287+PM5, Bamako, Mali.
6. General Directorate of Public Health and Hygiene of Ministry of Health and Social

1  
2  
3 Development, BP 232 Koulouba, Bamako, Mali.  
4

- 5 7. Assistant Director General, Health Emergencies Program, World Health Organization,  
6  
7 Headquarters. Avenue Appia 20, 1211 Geneva, Switzerland.  
8  
9

10  
11  
12 **Keywords:** health facility typology, health service availability, health system assessments, health  
13  
14 system policy  
15

16 **Word count:** 2413 words  
17  
18  
19  
20  
21  
22  
23  
24  
25  
26  
27  
28  
29  
30  
31  
32  
33  
34  
35  
36  
37  
38  
39  
40  
41  
42  
43  
44  
45  
46  
47  
48  
49  
50  
51  
52  
53  
54  
55  
56  
57  
58  
59  
60

For peer review only

## Abstract

**Introduction:** Using health facility types as a measure of service availability is a common approach in international standards for health system policy and planning. However, this proxy may not accurately reflect the actual availability of specific health services.

**Objective:** This study aims to evaluate the reliability of health facility typology as an indicator of specific health service availability and explore whether certain facility types consistently provide particular services.

**Design:** We analyzed a comprehensive dataset containing information from 1,725 health facilities in Mali. To uncover and visualize patterns within the dataset, we utilized two analytical techniques: Multiple Correspondence Analysis and Between-Class Analysis. These analyses allowed us to quantitatively measure the influence of health facility types on the variation in health service provisioning. Additionally, we developed and calculated a Consistency Index, which assesses the consistency of a health facility type in providing specific health services. By examining various health facilities and services, we sought to determine the accuracy of facility types as indicators of service availability.

**Setting:** The study focused on the health system in Mali as a case study.

**Results:** Our findings indicate that using health facility types as a proxy for service availability in Mali is not an accurate representation. We observed that most of the variation in service provision does not stem from differences between facility types but rather within facility types. This suggests that relying solely on health facility typology may lead to an incomplete understanding of health service availability.

**Conclusions:** These results have significant implications for health policy and planning. The reliance on health facility types as indicators for health system policy and planning should be reconsidered. A more nuanced and evidence-based understanding of health service availability is crucial for effective health policy and planning, as well as for the assessment and monitoring of health systems.

## Article Summary

### Strengths and limitations of this study

- The study utilizes a comprehensive dataset containing information from 1,725 health facilities in Mali, which provides a robust foundation for the analysis.
- Different analytical methods have been applied to study the underlying structures in the dataset. We have employed both a Multiple Correspondence Analysis and Between-Class Analysis. In addition to these techniques, we have also constructed a consistency index to ensure that we can also compare how consistent certain services are provided in different types of health facilities.

- The study also explores whether different geospatial patterns for the relationship between health facility typology and health service availability can be observed.
- The study's findings may be specific to the healthcare system in Mali and may not be directly applicable to other countries or settings. Future research should confirm whether similar patterns are observed in other countries.

For peer review only

## 1 Introduction

2 Universal health coverage aims to ensure that everyone can access the necessary health services they  
3 require, regardless of time, place, or financial constraints[1,2]. Understanding the geographical  
4 distribution of health services is crucial in identifying areas where access to health services may be  
5 limited[3,4]. Policymakers and practitioners have often used the distribution of specific types of health  
6 facilities relative to the population to address this issue. Health facility types are often grouped into  
7 different categories, such as health posts, health centers, clinics and district hospitals[3]. These  
8 classifications can vary depending on the country or context. Studies have used information on health  
9 facility typology to assess the geographical accessibility of different health services. However, there  
10 are inconsistencies in how these types are defined and categorized in different studies. For example,  
11 Ouma et al. (2018)[5] assumed that emergency care is available at all hospitals, while Hullah et al.  
12 (2019)[6] manually reclassified health facility types into self-defined categories, assuming distinct  
13 capabilities for different types. Additionally, Weiss et al. (2020)[7] selected specific facility types, such  
14 as hospitals and clinics, in different facility datasets without a common definition. According to  
15 guidelines for facility coverage, set by the Sphere Project in 2018[8] and the Global Health Cluster in  
16 2021[9], one health facility should be available for every 10,000 people regardless of the type and one  
17 district or rural hospital should be available for every 250,000 people in a given administrative area.  
18 However, little is known about the relationship between facility type and the effective availability of  
19 essential health services at the health facility level[3], as health facility datasets typically do not include  
20 information on the type of services effectively provided by a facility[7,10]. Relatively few studies have  
21 examined the influence of facility type on the availability of specific health services[11,12] but to our  
22 knowledge no analysis of multiple essential services has yet measured the extent of this relationship  
23 more broadly.

24  
25 The World Health Organization's (WHO) Health Resources and Services Availability Monitoring System  
26 (HeRAMS) gathers and presents core information on essential health resources and services[13]. This  
27 information is crucial for decision makers at national, regional and global levels. The initiative supports  
28 countries in standardizing and continuously collecting, analyzing, and disseminating information on  
29 essential health resources and services[13]. It provides a standardized process for the production and  
30 maintenance of an authoritative master facility list that includes core information on the availability  
31 of essential health services. Information gathered on healthcare institutions is compiled and verified  
32 by local service providers[3,14].



1  
2  
3 34 The HeRAMS Initiative provides an opportunity to clarify how accurately the typology of health  
4 35 facilities reflects the availability of specific health services and whether health facility types are a good  
5 36 indicator for assessing the distribution of and accessibility to health services. In Mali, HeRAMS has  
6 37 been operational since 2013. It currently provides regular information on 2,676 health facilities. A  
7 38 comprehensive report on the exhaustive mapping of health facilities in Mali was published in  
8 39 2020[15], with an update published in October 2022[16]. As a result, Mali is now one of the countries  
9 40 where the accuracy of the typology of health facilities can be effectively assessed in relation to the  
10 41 availability of health services. Therefore, this study aims to analyze the accuracy of health facility types  
11 42 in representing health service availability using the most recent HeRAMS data for Mali. We assess  
12 43 whether the typology of a health facility explains the availability of a large set of health services at the  
13 44 facility level. The results can help to guide decision- and policymakers in redirecting health system  
14 45 assessments and surveillance strategies towards the most meaningful information and indicators and  
15 46 ultimately improve populations' access to healthcare.  
16  
17  
18  
19  
20  
21  
22  
23  
24  
25  
26  
27  
28  
29

## 30 48 2. Methods

### 31 50 2.1 Data collection

32 51 Mali health facility data were extracted from the HeRAMS database and included up-to-date  
33 52 information on essential health service provisioning at the facility level (as of October 4, 2022). For  
34 53 this study, we only focused on public health facilities that constitute the backbone of the three-level  
35 54 pyramidal health system in Mali, namely the Community Health Centers (CHCs), the Reference Health  
36 55 Centers (RHCs), and the Hospitals (Hs), giving us a total of 1,725 observations. CHCs, RHCs and Hs  
37 56 represented 95% (n = 1646), 4% (n = 66) and 1% (n = 13) of the facilities, respectively. All essential  
38 57 health services reported in the HeRAMS database (n = 92) were considered, and the response for each  
39 58 service in each health facility could be "Available", "Partially available", "Not available" or "Not  
40 59 normally provided. If a service is available, it is considered that a health service provider is able to  
41 60 provide the service without limitations or barriers. A partially available service is considered not fully  
42 61 available because the health service provider encounters obstacles or limitations in providing the  
43 62 service, such as financial constraints or insufficient equipment. An unavailable service is a service that  
44 63 should normally be provided but cannot currently be provided because of lack of human resources,  
45 64 medical supplies, financial constraints or other impeding factors. If a service is not normally provided,  
46 65 it means that the service is not available but also that it is not part of the package of services normally  
47 66 provided by that the health service provider.  
48  
49  
50  
51  
52  
53  
54  
55  
56  
57  
58  
59  
60

## 2.2 Statistical analysis

In our study, we investigated the connection between different types of health facilities and the availability of essential health services. To simplify our analysis, we categorized the responses from HeRAMS into two groups: "Available" and "Not available". We combined the responses of "Available" and "Partially available" into the "Available" category, while grouping "Not available" and "Not normally provided" as "Not available".

To understand the underlying patterns in the data and determine the percentage of variance in health service provisioning explained by health facility types, we employed two statistical techniques. Firstly, we conducted a Multiple Correspondence Analysis (MCA), which is similar to Principal Component Analysis (PCA), but specifically designed for categorical data[17]. Next, we performed a Between-Class Analysis (BCA), which is a variant of PCA that incorporates instrumental variables (PCAIV), in which there is only a single factor as explanatory variable[18].

The ratio of BCA inertia to MCA inertia indicates the proportion of variance explained by the different health facility types. We assessed the significance of this percentage through a Monte-Carlo procedure involving 999 permutations.

## 2.3 Consistency index

We also developed and calculated a Consistency Index (CI) to measure the consistency of health facility types in providing specific essential health services. The formula for CI is:

$$CI = \frac{|a - b|}{a + b}$$

Here, CI represents the Consistency Index, and 'a' and 'b' are the counts of observations for the two possible responses, namely "available" or "not available". For example, 'a' could represent the number of responses indicating "available" while 'b' represents the number of responses indicating "not available". The CI values range from 0 (indicating low consistency) to 1 (indicating high consistency). We calculate the CI for each individual service within a particular type of health facility.

Since HeRAMS covers 92 services and our focus is on three types of health care providers, the CI values follow a specific distribution. We tested the differences in CI values between the three facility types using Wilcoxon tests and employed the Holm procedure to control the family-wise error rate. Additionally, we assessed how the CI varies among the five essential health service pillars, which include general clinical and emergency care services, child health and nutrition, communicable

101 diseases, sexual and reproductive health, and noncommunicable diseases.

102

103 Finally, focusing on the most frequent health facility type only (i.e, CHC), we analyzed how the health  
104 service availability varied across the ten Malian regions (i.e, Gao, Kayes, Kidal, Koulikoro, Ménaka,  
105 Mopti, Ségou, Sikasso, Taoudénit, and Tombouctou) and the capital district Bamako. We calculated  
106 the average probability of an essential health service being available in each region.

107

### 108 **3. Results**

#### 109 **3.1 Rethinking Health Facility Types as Indicators of Service Availability**

110 Only a small portion of service availability can be attributed to health facility types, as demonstrated  
111 in Figure 1. The BCA reveals that health facility types explain merely 6.3% of the variance in service  
112 availability ( $p = 0.001$ ). This indicates that the majority of variability in health service provisioning  
113 stems from differences within facility types rather than between them.

114

#### 115 **3.2 Examining Consistency in Health Facility Types for Service Provision**

116 To avoid making broad generalizations about all facilities, it is important to recognize that some types  
117 of facilities may have a greater level of consistency in providing certain services compared to others.  
118 To account for this variation, we created a Consistency Index. Our analysis revealed that service  
119 availability or non-availability is most consistent within CHCs ( $p < 0.001$ ). However, significant  
120 variability between services remains pronounced within each facility type (Figure 2a). For Hs and RHCs,  
121 the median CI values are relatively low, close to 0.5. This indicates that, on average, approximately  
122 one quarter of health facilities have a service provisioning pattern that differs from the other three  
123 quarters of facilities. Although service provisioning patterns show greater similarity among CHCs, the  
124 conclusion remains unchanged that health facility types are not a reliable indicator of health service  
125 availability.

126

#### 127 **3.3 Some essential health services are more consistently provided than others**

128 In order to gain a comprehensive understanding of service availability, we delved deeper into the  
129 consistency of service provision across various essential health services at the different facility types.  
130 Our analysis revealed distinct variations in patterns, indicating that different sets of essential health  
131 services and facility types exhibit diverse levels of consistency (Figure 2b). Notably, when examining  
132 the delivery of sexual and reproductive health services in Hs, we observed high inconsistency (median  
133 = 0.23), suggesting a lack of clear patterns regarding the availability of these services. Conversely, in  
134 CHCs, the availability of general clinical services and emergency care demonstrated a high level of

1  
2  
3 135 consistency (median = 0.83). These findings reveal that the consistency of service provisioning differs  
4  
5 136 among facility types across various service pillars, suggesting that health facility type can only serve as  
6  
7 137 a reliable proxy for health service availability in very few specific instances. Moreover, even seemingly  
8  
9 138 straightforward assumptions, such as the availability of maternal health services in Hs, cannot be  
10  
11 139 universally assumed, as previously suggested by Wigley et al. (2020)[19].  
12

140

13 141 Furthermore, to account for potential spatial variations in service availability, we conducted a  
14  
15 142 comparison of service consistency among CHCs across the different regions of Mali. The results  
16  
17 143 revealed substantial differences in service availability between regions (Figure 2c). Southern regions,  
18  
19 144 including Bamako, Kayes, Koulikoro, Mopti, Ségou, and Sikasso, exhibited a higher probability of  
20  
21 145 having essential health services available (median = 0.47), while the availability was notably low in  
22  
23 146 Ménaka (0.21).

147

## 148 Discussion

25  
26 149 This study reveals that it is misleading to rely solely on the typology of health facilities as a proxy of  
27  
28 150 the availability of health services. Yet, health system performance indicators such as availability and  
29  
30 151 accessibility are often presented by type of health facility[5,8,9,19], as if there is a common agreement  
31  
32 152 on the service packages that a particular type of facility should offer. Additionally, certain policy  
33  
34 153 documents and guidelines[8,9,20], particularly in the area of emergencies, still use typology and  
35  
36 154 service availability of services interchangeably and do not address the limitations and challenges of  
37  
38 155 using such indicators. Our research shows that they are not as closely linked as previously thought and  
39  
40 156 that their use for health system planning and monitoring should be reconsidered.

157

41  
42 158 One key health indicator often used in health system planning or monitoring is the average population  
43  
44 159 per functioning health facility by type and by administrative unit. The Sphere handbook discusses the  
45  
46 160 need to consider combinations of types and to adjust coverage thresholds according to context[8],  
47  
48 161 while the Global Health Cluster Guidance points out that this indicator is recommended as a proxy for  
49  
50 162 geographic accessibility and equity of health facility availability across administrative units[9]. In both  
51  
52 163 cases, there is no discussion of the importance or value of the accessibility of health facilities in the  
53  
54 164 absence of information on the services they actually provide. Similarly the Humanitarian Indicators  
55  
56 165 Registry[20] also does not discuss this indicator inadequacy to represent the availability of and  
57  
58 166 accessibility to essential health services but rather its incompleteness on other secondary dimensions,  
59  
60 167 for example service quality.

168

1  
2  
3 169 This results also showed that the consistency of service provisioning between different facility types  
4  
5 170 varies across different service pillars, indicating that health facility type may represent a good proxy  
6  
7 171 for health service availability, but only in very few specific cases. Taking into account the most frequent  
8  
9 172 health facility type, which occurred to be also the most consistent type in terms of service provisioning  
10  
11 173 (i.e., CHC), service availability largely differs from one region to another. This could be indirectly  
12  
13 174 explained by political and security contexts and stresses the importance of assessing the service  
14  
15 175 availability at the facility level and avoiding false assumptions.

16  
17 176  
18 177 In addition to being poor proxies of the availability of and accessibility to essential health services,  
19  
20 178 indicators based on geolocation and health facility type may suffer from other limitations due to the  
21  
22 179 availability and quality of the data to support them. These limitations include the persistence of large  
23  
24 180 differences in typology between different health facility datasets within a country. South et al.  
25  
26 181 (2021)[3] showed that even though the total number of facilities captured by different datasets within  
27  
28 182 a country can be quite similar, the geographical distribution of the facility types is extremely different.  
29  
30 183 Other limitations should be expected from the lack of information on the functionality of these  
31  
32 184 facilities and their ability to actually deliver certain services. This limitation can be particularly acute  
33  
34 185 in emergency settings where health facilities often face major disruptions.

35 186

36 187

### 37 188 **Conclusion**

38 189 For all these reasons, indicators based on geolocation and health facility type are not efficient proxies  
39  
40 190 for assessing the availability and accessibility of essential health services. The results observed in Mali  
41  
42 191 suggest that relying on such indicators could lead to misleading interpretations of needs, gaps, and  
43  
44 192 priorities, which are crucial for decision makers striving to ensure equitable access to healthcare  
45  
46 193 services in line with Sustainable Development Goal 3. Consequently, there is a need to redefine the  
47  
48 194 nature and scope of health system assessments and monitoring. Instead of focusing solely on the  
49  
50 195 availability of certain types of health facilities, assessments should explicitly prioritize evaluating  
51  
52 196 service availability.

53 197

54 198 Other studies have examined the influence of facility type on the availability of specific health  
55  
56 199 services[11,12] but this study is the first to focus on a wide range of essential health services. This  
57  
58 200 case study was carried out in Mali and further research is needed to generalize our findings,  
59  
60 201 however it is expected that similar patterns exist in other settings and countries.

202

## 203 Author Contributions

204 The study was initially conceptualized by SP and further supported by PT. The methodology was  
205 initially developed by PT and reviewed by FH, NR and SP. Data analysis and processing were done by  
206 PT. Writing of the original draft was done by FH, PT and SP supported by NR. Initial reviews on the  
207 figures were given by FH, SP, and NR. Initial reviews on the text were given by OT and CF. All authors  
208 have further assisted in thoroughly reviewing all figures and texts.

## 210 Funding statement

211 This research received no specific grant from any funding agency in the public, commercial or not-  
212 for-profit sectors.

## 214 Data and code sharing

215 The health facility data used in this study can be obtained upon reasonable request from HeRAMS.  
216 Additionally, the statistical code required to replicate the data analysis will be accessible through a  
217 dedicated Zenodo repository upon publication.

## 219 Conflicts of interest

220 The authors have no conflicts of interest to declare.

## References

- 1 Kieny MP, Bekedam H, Dovlo D, *et al.* Strengthening health systems for universal health coverage and sustainable development. *Bulletin of the World Health Organization*. 2017;**95**:537–9. doi:<http://dx.doi.org/10.2471/BLT.16.187476>
- 2 Wagstaff A, Neelsen S. A comprehensive assessment of universal health coverage in 111 countries: a retrospective observational study. *The Lancet Global Health* 2020;**8**:e39–49. doi:10.1016/S2214-109X(19)30463-2
- 3 South A, Dicko A, Herringer M, *et al.* A reproducible picture of open access health facility data in Africa and R tools to support improvement [version 2; peer review: 3 approved, 1 approved with reservations]. *Wellcome Open Research* 2021;**5**. doi:10.12688/wellcomeopenres.16075.2
- 4 World Health Organization. *Transforming health services delivery towards people-centred health systems*. WHO Regional Office for Europe 2014. <https://apps.who.int/iris/handle/10665/136409> (accessed 2 Nov 2022).
- 5 Ouma PO, Maina J, Thurania PN, *et al.* Access to emergency hospital care provided by the public sector in sub-Saharan Africa in 2015: a geocoded inventory and spatial analysis. *The Lancet Global Health* 2018;**6**:e342–50.

- 1
- 2
- 3
- 4 6 Hulland EN, Wiens KE, Shirude S, *et al.* Travel time to health facilities in areas of outbreak
- 5 potential: maps for guiding local preparedness and response. *BMC Medicine* 2019;**17**:232.
- 6 doi:10.1186/s12916-019-1459-6
- 7
- 8 7 Weiss D, Nelson A, Vargas-Ruiz C, *et al.* Global maps of travel time to healthcare facilities. *Nature*
- 9 *Medicine* 2020;**26**:1835–8.
- 10
- 11 8 Sphere Project, editor. *The sphere handbook: humanitarian charter and minimum standards in*
- 12 *humanitarian response*. Fourth edition. Geneva, Switzerland: : Sphere Association 2018.
- 13
- 14 9 Global Health Cluster. GHC Guidance: People in Need Calculations Version 2.0.
- 15 2021.[https://healthcluster.who.int/docs/librariesprovider16/meeting-reports/ghc-pin-](https://healthcluster.who.int/docs/librariesprovider16/meeting-reports/ghc-pin-severityguidance-v2.0.pdf?Status=Master&sfvrsn=85ffa08e_9)
- 16 [severityguidance-v2.0.pdf?Status=Master&sfvrsn=85ffa08e\\_9](https://healthcluster.who.int/docs/librariesprovider16/meeting-reports/ghc-pin-severityguidance-v2.0.pdf?Status=Master&sfvrsn=85ffa08e_9) (accessed 13 Jan 2023).
- 17
- 18 10 Maina J, Ouma PO, Macharia PM, *et al.* A spatial database of health facilities managed by the
- 19 public health sector in sub Saharan Africa. *Scientific data* 2019;**6**:1–8.
- 20
- 21 11 Kim ET, Singh K, Speizer IS, *et al.* Influences of health facility type for delivery and experience of
- 22 cesarean section on maternal and newborn postnatal care between birth and facility discharge
- 23 in Malawi. *BMC Health Services Research* 2020;**20**:139. doi:10.1186/s12913-020-4958-4
- 24
- 25 12 Seiglie JA, Serván-Mori E, Begum T, *et al.* Predictors of health facility readiness for diabetes
- 26 service delivery in low- and middle-income countries: The case of Bangladesh. *Diabetes*
- 27 *Research and Clinical Practice* 2020;**169**. doi:10.1016/j.diabres.2020.108417
- 28
- 29 13 World Health Organization. HeRAMS Strategic Framework.
- 30 2022.<https://www.who.int/publications/m/item/herams-strategic-framework>
- 31
- 32 14 World Health Organization. *Health resources and services availability monitoring system*
- 33 *(HeRAMS): external evaluation report, July 2019*. Geneva: : World Health Organization 2021.
- 34 <https://apps.who.int/iris/handle/10665/339850>
- 35
- 36 15 World Health Organization. HeRAMS Mali Baseline Report 2020. 2021.
- 37 <https://www.who.int/publications/m/item/herams-mali-baseline-report-2020> (accessed 2 Nov
- 38 2022).
- 39
- 40 16 World Health Organization. HeRAMS Mali Status Update Report April 2022: Operational status
- 41 of the health system. 2022. [https://www.who.int/publications/m/item/herams-mali-status-](https://www.who.int/publications/m/item/herams-mali-status-update-report-2022-04-operational-status-of-the-health-system)
- 42 [update-report-2022-04-operational-status-of-the-health-system](https://www.who.int/publications/m/item/herams-mali-status-update-report-2022-04-operational-status-of-the-health-system) (accessed 2 Nov 2022).
- 43
- 44 17 Bartholomew DJ, editor. *The analysis and interpretation of multivariate data for social scientists*.
- 45 Boca Raton, Fla: : Chapman & Hall/CRC 2002.
- 46
- 47 18 Dray S, Jombart T. Revisiting Guerry’s data: Introducing spatial constraints in multivariate
- 48 analysis. *Ann Appl Stat* 2011;**5**. doi:10.1214/10-AOAS356
- 49
- 50 19 Wigley AS, Tejedor-Garavito N, Alegana V, *et al.* Measuring the availability and geographical
- 51 accessibility of maternal health services across sub-Saharan Africa. *BMC Medicine* 2020;**18**:237.
- 52 doi:10.1186/s12916-020-01707-6
- 53
- 54 20 Inter-Agency Standing Committee, Global Health Cluster. The humanitarian indicator registry.
- 55 2023.<https://ir.hpc.tools/applications/ir/indicator/h-a1a>
- 56
- 57
- 58
- 59
- 60



1  
2  
3  
4  
5  
6  
7  
8  
9  
10  
11  
12  
13  
14  
15  
16  
17  
18  
19  
20  
21  
22  
23  
24  
25  
26  
27  
28  
29  
30  
31  
32  
33  
34  
35  
36  
37  
38  
39  
40  
41  
42  
43  
44  
45  
46  
47  
48  
49  
50  
51  
52  
53  
54  
55  
56  
57  
58  
59  
60

For peer review only



## Figure legends

**Figure 1.** Multiple Correspondence Analysis (MCA) biplots of health facilities based on service availability. Colored ellipses assume multivariate t-distributions, and show the observations grouped by health facility type. Axis labels indicate how much of the variance is explained by each axis.

**Figure 2. Violin and box plots of the Consistency Index (CI) values for each health facility type, based on service availability and map indicating service availability at the regional level in Mali.** A) The violin plots show the distribution of the CI values taking into account all the essential health services, and the box plots show the median (horizontal line) and the interquartile range (IQR, box outline). The whiskers extend from the hinge to the highest and lowest value that are within  $1.5 \times \text{IQR}$  of the hinge. B) CI values for each health facility type and essential health service pillar, based on service availability. Q1: general clinical and emergency care services; Q2: child health and nutrition; Q3: communicable diseases; Q4: sexual and reproductive health; Q5: noncommunicable diseases. C) The mean probability by region for an essential health service to be available at a Community Health Center.

BMJ Open

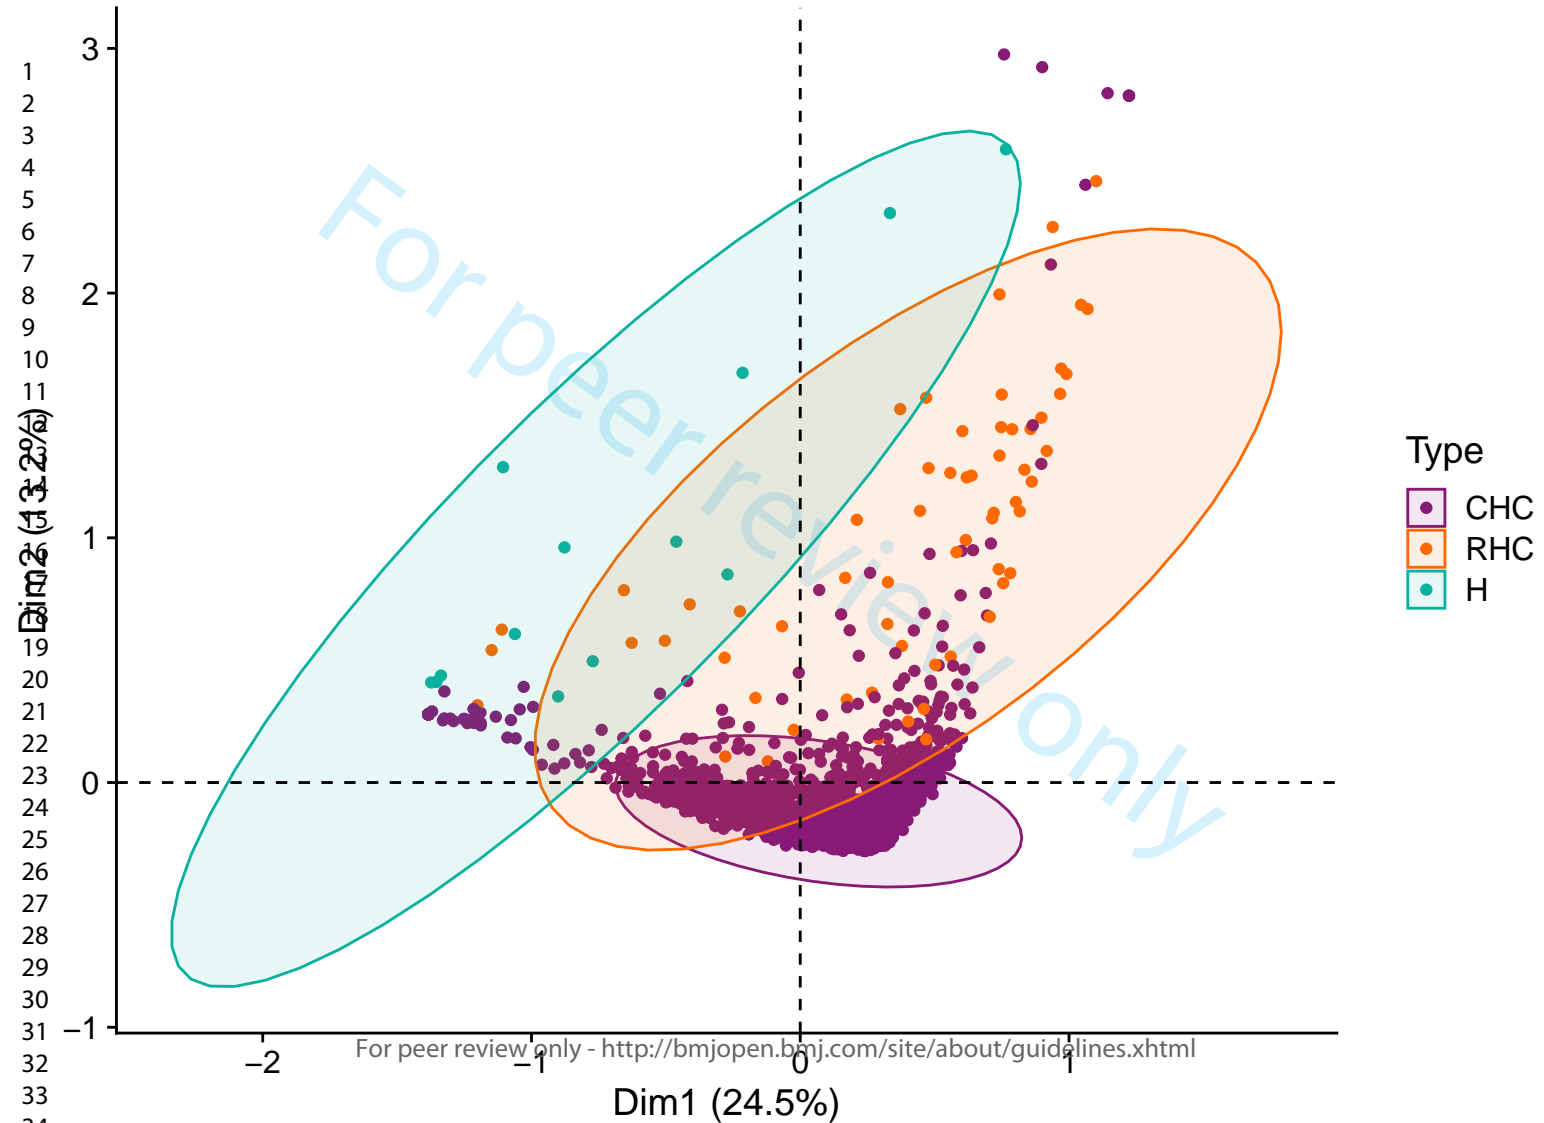

1  
2  
3  
4  
5  
6  
7  
8  
9  
10  
11  
12  
13  
14  
15  
16  
17  
18  
19  
20  
21  
22  
23  
24  
25  
26  
27  
28  
29  
30  
31  
32  
33  
34

1  
2  
3  
4  
5  
6  
7  
8  
9  
10  
11  
12  
13  
14  
15  
16  
17  
18  
19  
20  
21  
22  
23  
24  
25  
26  
27  
28  
29  
30  
31  
32  
33  
34  
35  
36  
37  
38  
39  
40  
41  
42  
43  
44  
45  
46

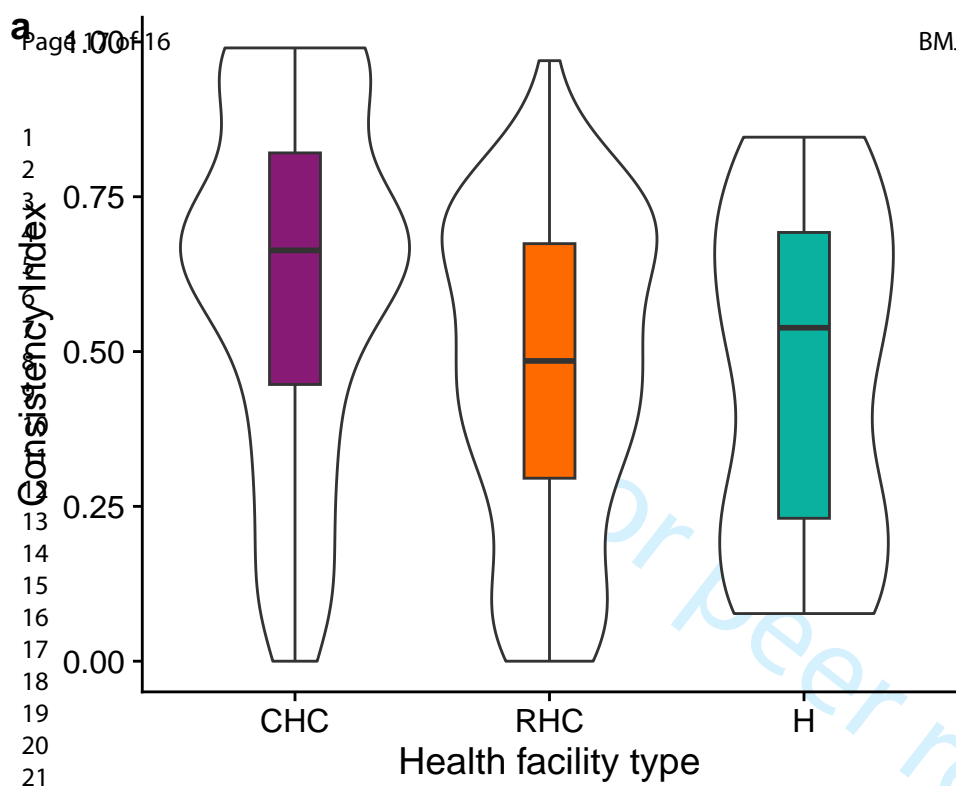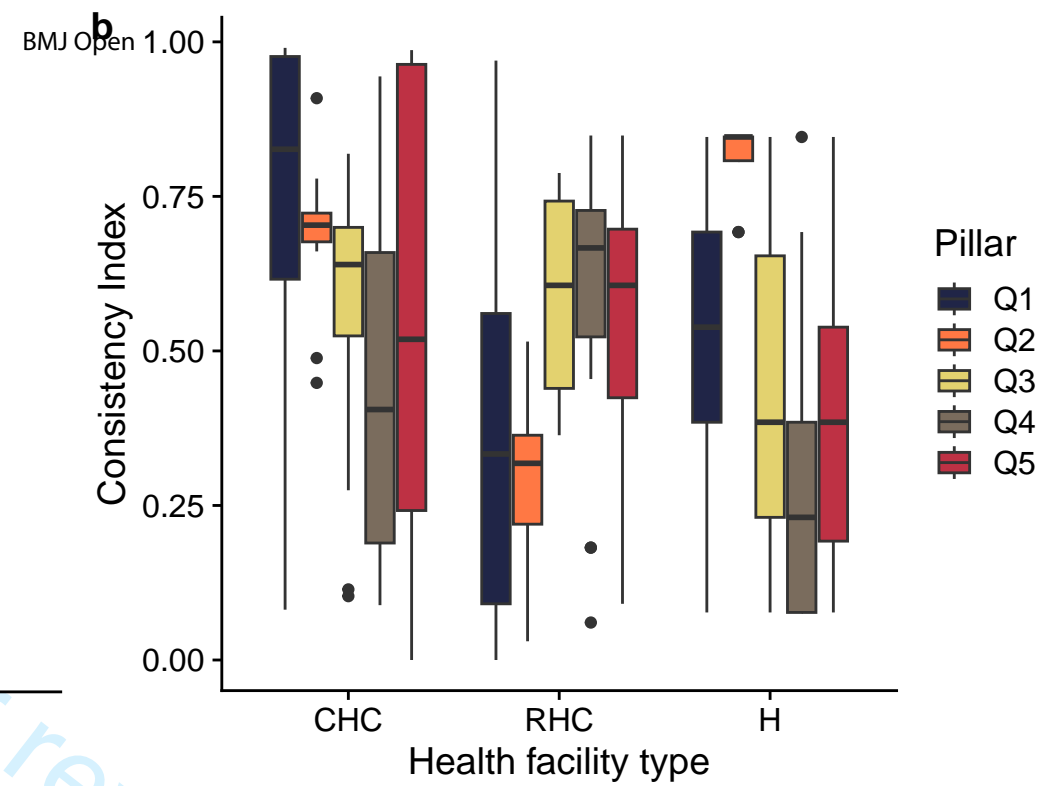

**c**

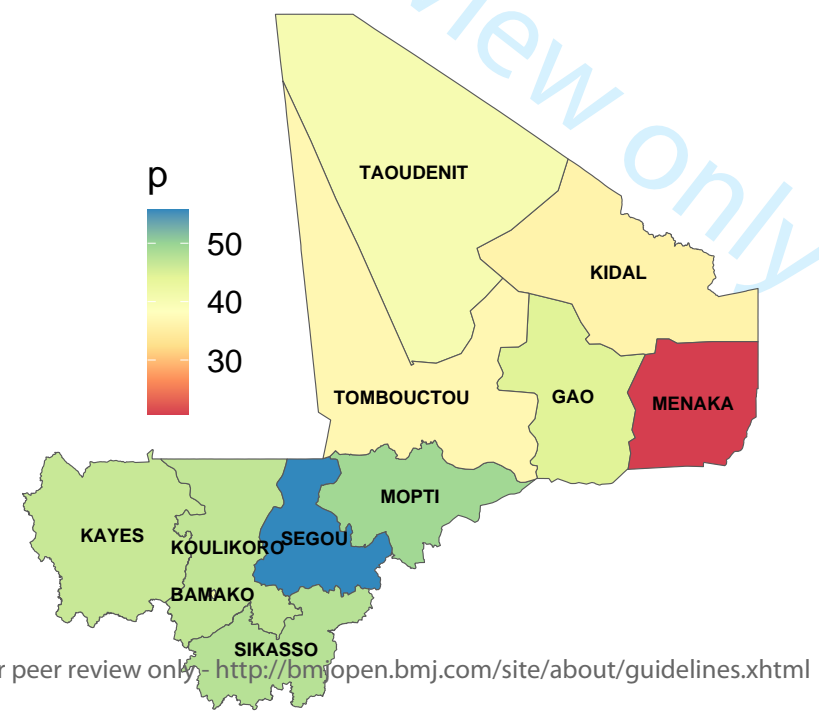

# BMJ Open

## Assessing the accuracy of health facility typology in representing the availability of health services: a case study in Mali

|                                 |                                                                                                                                                                                                                                                                                                                                                                                                                                                                                                                                                                                                                                                                                                                                                                                                                                                                                                                                                                                                                                                                                                                                                                                |
|---------------------------------|--------------------------------------------------------------------------------------------------------------------------------------------------------------------------------------------------------------------------------------------------------------------------------------------------------------------------------------------------------------------------------------------------------------------------------------------------------------------------------------------------------------------------------------------------------------------------------------------------------------------------------------------------------------------------------------------------------------------------------------------------------------------------------------------------------------------------------------------------------------------------------------------------------------------------------------------------------------------------------------------------------------------------------------------------------------------------------------------------------------------------------------------------------------------------------|
| Journal:                        | <i>BMJ Open</i>                                                                                                                                                                                                                                                                                                                                                                                                                                                                                                                                                                                                                                                                                                                                                                                                                                                                                                                                                                                                                                                                                                                                                                |
| Manuscript ID                   | bmjopen-2023-077127.R1                                                                                                                                                                                                                                                                                                                                                                                                                                                                                                                                                                                                                                                                                                                                                                                                                                                                                                                                                                                                                                                                                                                                                         |
| Article Type:                   | Original research                                                                                                                                                                                                                                                                                                                                                                                                                                                                                                                                                                                                                                                                                                                                                                                                                                                                                                                                                                                                                                                                                                                                                              |
| Date Submitted by the Author:   | 20-Nov-2023                                                                                                                                                                                                                                                                                                                                                                                                                                                                                                                                                                                                                                                                                                                                                                                                                                                                                                                                                                                                                                                                                                                                                                    |
| Complete List of Authors:       | <p>Petragallo, Samuel; World Health Organization, Health Resources and Services Availability Monitoring System (HeRAMS) Initiative</p> <p>Timoner, Pablo; University of Geneva, Geohealth group, Institute of Global Health; University of Geneva, Institute for Environmental Sciences</p> <p>Hierink, Fleur; University of Geneva, Geohealth group, Institute of Global Health; University of Geneva, Institute for Environmental Sciences</p> <p>Fuhrer, Caroline; World Health Organization, Health Resources and Services Availability Monitoring System (HeRAMS) Initiative</p> <p>Toure, Ousmane; World Health Organization Mali, Health Resources and Services Availability Monitoring System (HeRAMS) Initiative</p> <p>Iknane, Akory; University of Sciences, Technics and Technology</p> <p>Coulibaly, Youssouf; Ministry of Health and Social Development, General Directorate of Public Health and Hygiene of Ministry</p> <p>FALL , Ibrahima-Soce ; World Health Organization, Health Emergencies Program</p> <p>Ray, Nicolas; University of Geneva, Geohealth group, Institute of Global Health; University of Geneva, Institute for Environmental Sciences</p> |
| <b>Primary Subject Heading</b>: | Health services research                                                                                                                                                                                                                                                                                                                                                                                                                                                                                                                                                                                                                                                                                                                                                                                                                                                                                                                                                                                                                                                                                                                                                       |
| Secondary Subject Heading:      | Public health                                                                                                                                                                                                                                                                                                                                                                                                                                                                                                                                                                                                                                                                                                                                                                                                                                                                                                                                                                                                                                                                                                                                                                  |
| Keywords:                       | Health Services Accessibility, Health policy < HEALTH SERVICES ADMINISTRATION & MANAGEMENT, Organisation of health services < HEALTH SERVICES ADMINISTRATION & MANAGEMENT, Geographical mapping < TROPICAL MEDICINE                                                                                                                                                                                                                                                                                                                                                                                                                                                                                                                                                                                                                                                                                                                                                                                                                                                                                                                                                            |
|                                 |                                                                                                                                                                                                                                                                                                                                                                                                                                                                                                                                                                                                                                                                                                                                                                                                                                                                                                                                                                                                                                                                                                                                                                                |

SCHOLARONE™  
Manuscripts



I, the Submitting Author has the right to grant and does grant on behalf of all authors of the Work (as defined in the below author licence), an exclusive licence and/or a non-exclusive licence for contributions from authors who are: i) UK Crown employees; ii) where BMJ has agreed a CC-BY licence shall apply, and/or iii) in accordance with the terms applicable for US Federal Government officers or employees acting as part of their official duties; on a worldwide, perpetual, irrevocable, royalty-free basis to BMJ Publishing Group Ltd ("BMJ") its licensees and where the relevant Journal is co-owned by BMJ to the co-owners of the Journal, to publish the Work in this journal and any other BMJ products and to exploit all rights, as set out in our [licence](#).

The Submitting Author accepts and understands that any supply made under these terms is made by BMJ to the Submitting Author unless you are acting as an employee on behalf of your employer or a postgraduate student of an affiliated institution which is paying any applicable article publishing charge ("APC") for Open Access articles. Where the Submitting Author wishes to make the Work available on an Open Access basis (and intends to pay the relevant APC), the terms of reuse of such Open Access shall be governed by a Creative Commons licence – details of these licences and which [Creative Commons](#) licence will apply to this Work are set out in our licence referred to above.

Other than as permitted in any relevant BMJ Author's Self Archiving Policies, I confirm this Work has not been accepted for publication elsewhere, is not being considered for publication elsewhere and does not duplicate material already published. I confirm all authors consent to publication of this Work and authorise the granting of this licence.

## Assessing the accuracy of health facility typology in representing the availability of health services: a case study in Mali

Samuel Petragallo\*<sup>1</sup> (petragallos@who.int), Pablo Timoner\*<sup>2,3</sup> (Pablo.Timoner@unige.ch), Fleur Hierink\*<sup>2,3</sup> (Fleur.Hierink@unige.ch), Caroline Fuhrer<sup>1</sup> (fuhrerc@who.int), Ousmane Toure<sup>4</sup> (toureo@who.int), Akory Iknane<sup>5</sup> (akoryagiknane@gmail.com), Youssouf Coulibaly<sup>6</sup> (youssoufcsseware@yahoo.fr), Ibrahima Socé Fall<sup>7</sup> (socef@who.int), Nicolas Ray<sup>2,3</sup> (Nicolas.Ray@unige.ch)

\*Contributed equally

Corresponding author: Fleur Hierink, (fleur.hierink@unige.ch)

1. Health Resources and Services Availability Monitoring System (HeRAMS) Initiative, World Health Organization Headquarters. Avenue Appia 20, 1211 Geneva, Switzerland.
2. GeoHealth group, Institute of Global Health, Faculty of Medicine, University of Geneva. 9 Chemin des Mines, 1202 Geneva, Switzerland.
3. Institute for Environmental Sciences, University of Geneva. Boulevard Carl-Vogt 66, 1205 Geneva, Switzerland.
4. Health Resources and Services Availability Monitoring System (HeRAMS), World Health Organization, Quartier Ntomiboro- Bougou, B.P. 99, Bamako, Mali.
5. University of Sciences, Technics and Technology, J287+PM5, Bamako, Mali.
6. General Directorate of Public Health and Hygiene of Ministry of Health and Social Development, BP 232 Koulouba, Bamako, Mali.

1  
2  
3 7. Assistant Director General, Health Emergencies Program, World Health Organization,  
4  
5 Headquarters. Avenue Appia 20, 1211 Geneva, Switzerland.  
6  
7  
8  
9

10 **Keywords:** health facility typology, health service availability, health system assessments, health  
11  
12 system policy  
13

14 **Word count:** 2413 words  
15  
16  
17  
18  
19  
20  
21  
22  
23  
24  
25  
26  
27  
28  
29  
30  
31  
32  
33  
34  
35  
36  
37  
38  
39  
40  
41  
42  
43  
44  
45  
46  
47  
48  
49  
50  
51  
52  
53  
54  
55  
56  
57  
58  
59  
60

For peer review only

## Abstract

**Introduction:** Using health facility types as a measure of service availability is a common approach in international standards for health system policy and planning. However, this proxy may not accurately reflect the actual availability of specific health services.

**Objective:** This study aims to evaluate the reliability of health facility typology as an indicator of specific health service availability and explore whether certain facility types consistently provide particular services.

**Design:** We analyzed a comprehensive dataset containing information from 1,725 health facilities in Mali. To uncover and visualize patterns within the dataset, we utilized two analytical techniques: Multiple Correspondence Analysis and Between-Class Analysis. These analyses allowed us to quantitatively measure the influence of health facility types on the variation in health service provisioning. Additionally, we developed and calculated a Consistency Index, which assesses the consistency of a health facility type in providing specific health services. By examining various health facilities and services, we sought to determine the accuracy of facility types as indicators of service availability.

**Setting:** The study focused on the health system in Mali as a case study.

**Results:** Our findings indicate that using health facility types as a proxy for service availability in Mali is not an accurate representation. We observed that most of the variation in service provision does not stem from differences between facility types but rather within facility types. This suggests that relying solely on health facility typology may lead to an incomplete understanding of health service availability.

**Conclusions:** These results have significant implications for health policy and planning. The reliance on health facility types as indicators for health system policy and planning should be reconsidered. A more nuanced and evidence-based understanding of health service availability is crucial for effective health policy and planning, as well as for the assessment and monitoring of health systems.

### Strengths and limitations of this study

- The study benefits from a comprehensive dataset of 1,725 health facilities in Mali, contributing to a strong foundation for the analysis.
- By employing Multiple Correspondence Analysis, Between-Class Analysis, and constructing a consistency index, diverse analytical methods are used to explore underlying structures and compare service consistency across different facility types.
- The study investigates potential geospatial patterns in the relationship between health facility typology and health service availability.
- The findings are context-specific to the healthcare system in Mali, further research should validate whether similar patterns exist in other countries.



## 1 Introduction

2 Universal health coverage aims to ensure that everyone can access the necessary health services they  
3 require, regardless of time, place, or financial constraints[1,2]. Understanding the geographical  
4 distribution of health services is crucial in identifying areas where access to health services may be  
5 limited[3,4]. Policymakers and practitioners have often used the distribution of specific types of health  
6 facilities relative to the population to address this issue. Health facility types are often grouped into  
7 different categories, such as health posts, health centers, clinics and district hospitals[3]. These  
8 classifications can vary depending on the country or context. Studies have used information on health  
9 facility typology to assess the geographical accessibility of different health services. However, there  
10 are inconsistencies in how these types are defined and categorized in different studies. For example,  
11 Ouma et al. (2018)[5] assumed that emergency care is available at all hospitals, while Hullah et al.  
12 (2019)[6] manually reclassified health facility types into self-defined categories, assuming distinct  
13 capabilities for different types. Additionally, Weiss et al. (2020)[7] selected specific facility types, such  
14 as hospitals and clinics, in different facility datasets without a common definition. According to  
15 guidelines for facility coverage, set by the Sphere Project in 2018[8] and the Global Health Cluster in  
16 2021[9], one health facility should be available for every 10,000 people regardless of the type and one  
17 district or rural hospital should be available for every 250,000 people in a given administrative area.  
18 However, little is known about the relationship between facility type and the effective availability of  
19 essential health services at the health facility level[3], as health facility datasets typically do not include  
20 information on the type of services effectively provided by a facility[7,10]. Relatively few studies have  
21 examined the influence of facility type on the availability of specific health services[11,12] but to our  
22 knowledge no analysis of multiple essential services has yet measured the extent of this relationship  
23 more broadly.

24  
25 The World Health Organization's (WHO) Health Resources and Services Availability Monitoring System  
26 (HeRAMS) gathers and presents core information on essential health resources and services[13]. This  
27 information is crucial for decision makers at national, regional and global levels. The initiative supports  
28 countries in standardizing and continuously collecting, analyzing, and disseminating information on  
29 essential health resources and services[13]. It provides a standardized process for the production and  
30 maintenance of an authoritative master facility list that includes core information on the availability  
31 of essential health services. Information gathered on healthcare institutions is compiled and verified  
32 by local service providers[3,14].

1  
2  
3 34 The HeRAMS Initiative provides an opportunity to clarify how accurately the typology of health  
4 35 facilities reflects the availability of specific health services and whether health facility types are a good  
5 36 indicator for assessing the distribution of and accessibility to health services. In Mali, HeRAMS has  
6 37 been operational since 2013. It currently provides regular information on 2,676 health facilities. A  
7 38 comprehensive report on the exhaustive mapping of health facilities in Mali was published in  
8 39 2020[15], with an update published in October 2022[16]. As a result, Mali is now one of the countries  
9 40 where the accuracy of the typology of health facilities can be effectively assessed in relation to the  
10 41 availability of health services. Therefore, this study aims to analyze the accuracy of health facility types  
11 42 in representing health service availability using the most recent HeRAMS data for Mali. We assess  
12 43 whether the typology of a health facility explains the availability of a large set of health services at the  
13 44 facility level. The results can help to guide decision- and policymakers in redirecting health system  
14 45 assessments and surveillance strategies towards the most meaningful information and indicators and  
15 46 ultimately improve populations' access to healthcare.

47

## 48 2. Methods

49

### 50 2.1 Data collection

51 Mali health facility data were extracted from the HeRAMS database and included up-to-date  
52 information on essential health service provisioning at the facility level (as of October 4, 2022). For  
53 this study, we only focused on public health facilities that constitute the backbone of the three-level  
54 pyramidal health system in Mali, namely the Community Health Centers (CHCs), the Reference Health  
55 Centers (RHCs), and the Hospitals (Hs), giving us a total of 1,725 observations. CHCs, RHCs and Hs  
56 represented 95% (n = 1646), 4% (n = 66) and 1% (n = 13) of the facilities, respectively. All essential  
57 health services reported in the HeRAMS database (n = 92) were considered, and the response for each  
58 service in each health facility could be "Available", "Partially available", "Not available" or "Not  
59 normally provided". If a service is available, it is considered that a health service provider is able to  
60 provide the service without limitations or barriers. A partially available service is considered not fully  
61 available because the health service provider encounters obstacles or limitations in providing the  
62 service, such as financial constraints or insufficient equipment. An unavailable service is a service that  
63 should normally be provided but cannot currently be provided because of lack of human resources,  
64 medical supplies, financial constraints or other impeding factors. If a service is not normally provided,  
65 it means that the service is not available but also that it is not part of the package of services normally  
66 provided by the health service provider. Our study did not require ethical approval from a research  
67 commission since the data collected did not involve any individual or patient-specific information.

60

68 Instead, it primarily consisted of data at the health facility level regarding service provision. As a result,  
69 no ethical clearance was necessary for this data collection.

## 71 **2.2 Patient and Public Involvement**

72 This study did not involve specific patient or public involvement due to its focus on analyzing health-  
73 facility level data and exploring broader geographical patterns regarding the representativeness of  
74 health facility typology in healthcare service availability.

## 76 **2.3 Statistical analysis**

77 In our study, we investigated the connection between different types of health facilities and the  
78 availability of essential health services. To simplify our analysis, we categorized the responses from  
79 HeRAMS into two groups: "Available" and "Not available". We combined the responses of "Available"  
80 and "Partially available" into the "Available" category, while grouping "Not available" and "Not  
81 normally provided" as "Not available".

82  
83 To understand the underlying patterns in the data and determine the percentage of variance in health  
84 service provisioning explained by health facility types, we employed two statistical techniques. Firstly,  
85 we conducted a Multiple Correspondence Analysis (MCA), which is similar to Principal Component  
86 Analysis (PCA), but specifically designed for categorical data[17]. Next, we performed a Between-Class  
87 Analysis (BCA), which is a variant of PCA that incorporates instrumental variables (PCAIV), in which  
88 there is only a single factor as explanatory variable[18].

89  
90 The ratio of BCA inertia to MCA inertia indicates the proportion of variance explained by the different  
91 health facility types. We assessed the significance of this percentage through a Monte-Carlo procedure  
92 involving 999 permutations.

## 94 **2.4 Consistency index**

95 We also developed and calculated a Consistency Index (CI) to measure the consistency of health facility  
96 types in providing specific essential health services. The formula for CI is:

$$97 \quad CI = \frac{|a - b|}{a + b}$$

98 Here, CI represents the Consistency Index, and 'a' and 'b' are the counts of observations for the two  
99 possible responses, namely "available" or "not available". For example, 'a' could represent the number  
100 of responses indicating "available" while 'b' represents the number of responses indicating "not

1  
2  
3 101 available". The CI values range from 0 (indicating low consistency) to 1 (indicating high consistency).  
4  
5 102 We calculate the CI for each individual service within a particular type of health facility.

6 103  
7  
8 104 Since HeRAMS covers 92 services and our focus is on three types of health care providers, the CI values  
9  
10 105 follow a specific distribution. We tested the differences in CI values between the three facility types  
11  
12 106 using Wilcoxon tests and employed the Holm procedure to control the family-wise error rate.  
13  
14 107 Additionally, we assessed how the CI varies among the five essential health service pillars, which  
15  
16 108 include general clinical and emergency care services, child health and nutrition, communicable  
17  
18 109 diseases, sexual and reproductive health, and noncommunicable diseases.

19 110  
20 111 Finally, focusing on the most frequent health facility type only (i.e, CHC), we analyzed how the health  
21  
22 112 service availability varied across the ten Malian regions (i.e, Gao, Kayes, Kidal, Koulikoro, Ménaka,  
23  
24 113 Mopti, Ségou, Sikasso, Taoudénit, and Tombouctou) and the capital district Bamako. We calculated  
25  
26 114 the average probability of an essential health service being available in each region.

### 27 115 28 116 **3. Results**

#### 29 117 **3.1 Rethinking Health Facility Types as Indicators of Service Availability**

30 118 Only a small portion of service availability can be attributed to health facility types, as demonstrated  
31  
32 119 in Figure 1. The BCA reveals that health facility types explain merely 6.3% of the variance in service  
33  
34 120 availability ( $p = 0.001$ ). This indicates that the majority of variability in health service provisioning  
35  
36 121 stems from differences within facility types rather than between them.

#### 37 122 38 39 123 **3.2 Examining Consistency in Health Facility Types for Service Provision**

40 124 To avoid making broad generalizations about all facilities, it is important to recognize that some types  
41  
42 125 of facilities may have a greater level of consistency in providing certain services as compared to others.  
43  
44 126 To account for this variation, we created a Consistency Index. Our analysis revealed that service  
45  
46 127 availability or non-availability is most consistent within CHCs ( $p < 0.001$ ). However, significant  
47  
48 128 variability between services remains pronounced within each facility type (Figure 2a). For Hs and RHCs,  
49  
50 129 the median CI values are relatively low, close to 0.5. This indicates that, on average, approximately  
51  
52 130 one quarter of health facilities have a service provisioning pattern that differs from the other three  
53  
54 131 quarters of facilities. Although service provisioning patterns show greater similarity among CHCs, the  
55  
56 132 conclusion remains unchanged that health facility types are not a reliable indicator of health service  
57  
58 133 availability.

59 134  
60

### 135 **3.3 Some essential health services are more consistently provided than others**

136 In order to gain a comprehensive understanding of service availability, we delved deeper into the  
137 consistency of service provision across various essential health services at the different facility types.  
138 Our analysis revealed distinct variations in patterns, indicating that different sets of essential health  
139 services and facility types exhibit diverse levels of consistency (Figure 2b). Notably, when examining  
140 the delivery of sexual and reproductive health services in Hs, we observed high inconsistency (median  
141 = 0.23), suggesting a lack of clear patterns regarding the availability of these services. Conversely, in  
142 CHCs, the availability of general clinical services and emergency care demonstrated a high level of  
143 consistency (median = 0.83). These findings reveal that the consistency of service provisioning differs  
144 among facility types across various service pillars, suggesting that health facility type can only serve as  
145 a reliable proxy for health service availability in very few specific instances. Moreover, even seemingly  
146 straightforward assumptions, such as the availability of maternal health services in Hs, cannot be  
147 universally assumed, as previously suggested by Wigley et al. (2020)[19].

148

149 Furthermore, to account for potential spatial variations in service availability, we conducted a  
150 comparison of service consistency among CHCs across the different regions of Mali. The results  
151 revealed substantial differences in service availability between regions (Figure 2c). Southern regions,  
152 including Bamako, Kayes, Koulikoro, Mopti, Ségou, and Sikasso, exhibited a higher probability of  
153 having essential health services available (median = 0.47), while the availability was notably low in  
154 Ménaka (0.21).

155

### 156 **Discussion**

157 This study reveals that it is misleading to rely solely on the typology of health facilities as a proxy of  
158 the availability of health services. Yet, health system performance indicators such as availability and  
159 accessibility are often presented by type of health facility[5,8,9,19], as if there is a common agreement  
160 on the service packages that a particular type of facility should offer. This indicates that when  
161 conducting research and making policy decisions, relying on assumptions about the delivery of specific  
162 services across certain health facility types, like emergency obstetric care in all hospitals, can lead to  
163 incorrect conclusions. Instead, it is more appropriate to consider the actual availability of the service  
164 at the facility level, rather than relying solely on the type of facility. Additionally, certain policy  
165 documents and guidelines[8,9,20], particularly in the area of emergencies, still use typology and  
166 service availability of services interchangeably and do not address the limitations and challenges of  
167 using such indicators. Our research shows that they are not as closely linked as previously thought and  
168 that their use for health system planning and monitoring should be reconsidered.

1  
2  
3 169  
4  
5 170 One key health indicator often used in health system planning or monitoring is the average population  
6 171 per functioning health facility by type and by administrative unit. The Sphere handbook discusses the  
7  
8 172 need to consider combinations of types and to adjust coverage thresholds according to context[8],  
9  
10 173 while the Global Health Cluster Guidance points out that this indicator is recommended as a proxy for  
11 174 geographic accessibility and equity of health facility availability across administrative units[9]. In both  
12  
13 175 cases, there is no discussion of the importance or value of the accessibility of health facilities in the  
14  
15 176 absence of information on the services they actually provide. Similarly the Humanitarian Indicators  
16 177 Registry[20] also does not discuss this indicator inadequacy to represent the availability of and  
17  
18 178 accessibility to essential health services but rather its incompleteness on other secondary dimensions,  
19  
20 179 for example service quality.

21 180  
22  
23 181 The results also showed that the consistency of service provisioning between different facility types  
24  
25 182 varies across different service pillars, indicating that health facility type may represent a good proxy  
26  
27 183 for health service availability, but only in very few specific cases. Taking into account the most frequent  
28  
29 184 health facility type, which occurred to be also the most consistent type in terms of service provisioning  
30 185 (i.e., CHC), service availability largely differs from one region to another. This could be indirectly  
31  
32 186 explained by political and security contexts and stresses the importance of assessing the service  
33  
34 187 availability at the facility level and avoiding false assumptions.

35 188  
36  
37 189 In addition to being poor proxies of the availability of and accessibility to essential health services,  
38  
39 190 indicators based on geolocation and health facility type may suffer from other limitations due to the  
40  
41 191 availability and quality of the data to support them. These limitations include the persistence of large  
42  
43 192 differences in typology between different health facility datasets within a country. South et al.  
44  
45 193 (2021)[3] showed that even though the total number of facilities captured by different datasets within  
46  
47 194 a country can be quite similar, the geographical distribution of the facility types is extremely different.  
48  
49 195 Other limitations should be expected from the lack of information on the functionality of these  
50  
51 196 facilities and their ability to actually deliver certain services. This limitation can be particularly acute  
52  
53 197 in emergency settings where health facilities often face major disruptions.

52 198

53 199

## 55 200 **Conclusion**

56  
57 201 For all these reasons, indicators based on geolocation and health facility type are not efficient proxies  
58  
59 202 for assessing the availability and accessibility of essential health services. The results observed in Mali

1  
2  
3 203 suggest that relying on such indicators could lead to misleading interpretations of needs, gaps, and  
4  
5 204 priorities, which are crucial for decision makers striving to ensure equitable access to healthcare  
6  
7 205 services in line with Sustainable Development Goal 3. Consequently, there is a need to redefine the  
8  
9 206 nature and scope of health system assessments and monitoring. Instead of focusing solely on the  
10  
11 207 availability of certain types of health facilities, assessments should explicitly prioritize evaluating  
12  
13 208 service availability.

14 209

15 210 Other studies have examined the influence of facility type on the availability of specific health  
16  
17 211 services[11,12] but this study is the first to focus on a wide range of essential health services. This  
18  
19 212 case study was carried out in Mali and further research is needed to generalize our findings,  
20  
21 213 however it is expected that similar patterns exist in other settings and countries.

22 214

### 23 215 **Author Contributions**

24  
25 216 The study was initially conceptualized by SP and further supported by PT. The methodology was  
26  
27 217 initially developed by PT and reviewed by FH, NR and SP. Data analysis and processing were done by  
28  
29 218 PT. Writing of the original draft was done by FH, PT and SP supported by NR. Initial reviews on the  
30  
31 219 figures were given by FH, SP, and NR. Initial reviews on the text were given by OT and CF. AI, YC, ISF  
32  
33 220 have further assisted in thoroughly reviewing all figures and texts.

34 221

### 35 222 **Funding statement**

36  
37 223 This research received no specific grant from any funding agency in the public, commercial or not-  
38  
39 224 for-profit sectors.

40 225

### 41 226 **Ethics statement**

42  
43 227 Our study did not require ethical approval from a research commission since the data collected did  
44  
45 228 not involve any individual or patient-specific information. Instead, it primarily consisted of data at  
46  
47 229 the health facility level regarding service provision. As a result, no ethical clearance was necessary  
48  
49 230 for this data collection.

50 231

### 51 232 **Data and code sharing**

52  
53 233 The health facility data used in this study can be obtained upon reasonable request from HeRAMS.  
54  
55 234 Additionally, the statistical code required to replicate the data analysis will be accessible through a  
56  
57 235 dedicated Zenodo repository upon publication.

58 236

59  
60

1  
2  
3 **237 Conflicts of interest**

4  
5 **238** The authors have no conflicts of interest to declare.  
6  
7  
8  
9  
10  
11  
12  
13  
14  
15  
16  
17  
18  
19  
20  
21  
22  
23  
24  
25  
26  
27  
28  
29  
30  
31  
32  
33  
34  
35  
36  
37  
38  
39  
40  
41  
42  
43  
44  
45  
46  
47  
48  
49  
50  
51  
52  
53  
54  
55  
56  
57  
58  
59  
60

For peer review only



## References

- 1 Kienny MP, Bekedam H, Dovlo D, *et al.* Strengthening health systems for universal health coverage and sustainable development. *Bulletin of the World Health Organization*. 2017;**95**:537–9. doi:<http://dx.doi.org/10.2471/BLT.16.187476>
- 2 Wagstaff A, Neelsen S. A comprehensive assessment of universal health coverage in 111 countries: a retrospective observational study. *The Lancet Global Health* 2020;**8**:e39–49. doi:10.1016/S2214-109X(19)30463-2
- 3 South A, Dicko A, Herringer M, *et al.* A reproducible picture of open access health facility data in Africa and R tools to support improvement [version 2; peer review: 3 approved, 1 approved with reservations]. *Wellcome Open Research* 2021;**5**. doi:10.12688/wellcomeopenres.16075.2
- 4 World Health Organization. *Transforming health services delivery towards people-centred health systems*. WHO Regional Office for Europe 2014. <https://apps.who.int/iris/handle/10665/136409> (accessed 2 Nov 2022).
- 5 Ouma PO, Maina J, Thurania PN, *et al.* Access to emergency hospital care provided by the public sector in sub-Saharan Africa in 2015: a geocoded inventory and spatial analysis. *The Lancet Global Health* 2018;**6**:e342–50.
- 6 Hullah EN, Wiens KE, Shirude S, *et al.* Travel time to health facilities in areas of outbreak potential: maps for guiding local preparedness and response. *BMC Medicine* 2019;**17**:232. doi:10.1186/s12916-019-1459-6
- 7 Weiss D, Nelson A, Vargas-Ruiz C, *et al.* Global maps of travel time to healthcare facilities. *Nature Medicine* 2020;**26**:1835–8.
- 8 Sphere Project, editor. *The sphere handbook: humanitarian charter and minimum standards in humanitarian response*. Fourth edition. Geneva, Switzerland: : Sphere Association 2018.
- 9 Global Health Cluster. GHC Guidance: People in Need Calculations Version 2.0. 2021. [https://healthcluster.who.int/docs/librariesprovider16/meeting-reports/ghc-pin-severityguidance-v2.0.pdf?Status=Master&sfvrsn=85ffa08e\\_9](https://healthcluster.who.int/docs/librariesprovider16/meeting-reports/ghc-pin-severityguidance-v2.0.pdf?Status=Master&sfvrsn=85ffa08e_9) (accessed 13 Jan 2023).
- 10 Maina J, Ouma PO, Macharia PM, *et al.* A spatial database of health facilities managed by the public health sector in sub Saharan Africa. *Scientific data* 2019;**6**:1–8.
- 11 Kim ET, Singh K, Speizer IS, *et al.* Influences of health facility type for delivery and experience of cesarean section on maternal and newborn postnatal care between birth and facility discharge in Malawi. *BMC Health Services Research* 2020;**20**:139. doi:10.1186/s12913-020-4958-4
- 12 Seiglie JA, Serván-Mori E, Begum T, *et al.* Predictors of health facility readiness for diabetes service delivery in low- and middle-income countries: The case of Bangladesh. *Diabetes Research and Clinical Practice* 2020;**169**. doi:10.1016/j.diabres.2020.108417
- 13 World Health Organization. HeRAMS Strategic Framework. 2022. <https://www.who.int/publications/m/item/herams-strategic-framework>
- 14 World Health Organization. *Health resources and services availability monitoring system (HeRAMS): external evaluation report, July 2019*. Geneva: : World Health Organization 2021. <https://apps.who.int/iris/handle/10665/339850>

- 1  
2  
3 15 World Health Organization. HeRAMS Mali Baseline Report 2020. 2021.  
4 <https://www.who.int/publications/m/item/herams-mali-baseline-report-2020> (accessed 2 Nov  
5 2022).  
6  
7  
8 16 World Health Organization. HeRAMS Mali Status Update Report April 2022: Operational status  
9 of the health system. 2022. [https://www.who.int/publications/m/item/herams-mali-status-](https://www.who.int/publications/m/item/herams-mali-status-update-report-2022-04-operational-status-of-the-health-system)  
10 [update-report-2022-04-operational-status-of-the-health-system](https://www.who.int/publications/m/item/herams-mali-status-update-report-2022-04-operational-status-of-the-health-system) (accessed 2 Nov 2022).  
11  
12 17 Bartholomew DJ, editor. *The analysis and interpretation of multivariate data for social scientists*.  
13 Boca Raton, Fla: : Chapman & Hall/CRC 2002.  
14  
15 18 Dray S, Jombart T. Revisiting Guerry's data: Introducing spatial constraints in multivariate  
16 analysis. *Ann Appl Stat* 2011;**5**. doi:10.1214/10-AOAS356  
17  
18 19 Wigley AS, Tejedor-Garavito N, Alegana V, *et al*. Measuring the availability and geographical  
19 accessibility of maternal health services across sub-Saharan Africa. *BMC Medicine* 2020;**18**:237.  
20 doi:10.1186/s12916-020-01707-6  
21  
22 20 Inter-Agency Standing Committee, Global Health Cluster. The humanitarian indicator registry.  
23 2023.<https://ir.hpc.tools/applications/ir/indicator/h-a1a>  
24  
25  
26  
27  
28  
29  
30  
31  
32  
33  
34  
35  
36  
37  
38  
39  
40  
41  
42  
43  
44  
45  
46  
47  
48  
49  
50  
51  
52  
53  
54  
55  
56  
57  
58  
59  
60

## Figure legends

**Figure 1. Multiple Correspondence Analysis (MCA) biplots of health facilities based on service availability.** The figure shows the relationships between health facilities based on service availability. The points in this two-dimensional graph represent the health facilities. Closer points indicate more similarities in terms of service availability. Different types of health facilities are represented by different colors. The colored ellipses surrounding the points assume multivariate t-distributions. Each ellipse represents a different type of health facility, providing a visual representation of where most facilities of that type fall on the plot, thus capturing the multivariate dispersion of that group. The two axes of the graph depict the dimensions that account for the most variance in the data, with their labels indicating the proportion of the total variance explained by that axis. This means they represent the main patterns of differences in service availability between the health facilities.

**Figure 2. Violin and box plots of the Consistency Index (CI) values for each health facility type, based on service availability and map indicating service availability at the regional level in Mali.** A) The violin plots show the distribution of the CI values taking into account all the essential health services, and the box plots show the median (horizontal line) and the interquartile range (IQR, box outline). The whiskers extend from the hinge to the highest and lowest value that are within 1.5\*IQR of the hinge. B) CI values for each health facility type and essential health service pillar, based on service availability. Q1: general clinical and emergency care services; Q2: child health and nutrition; Q3: communicable diseases; Q4: sexual and reproductive health; Q5: noncommunicable diseases. C) The mean probability by region for an essential health service to be available at a Community Health Center.

BMJ Open



1  
2  
3  
4  
5  
6  
7  
8  
9  
10  
11  
12  
13  
14  
15  
16  
17  
18  
19  
20  
21  
22  
23  
24  
25  
26  
27  
28  
29  
30  
31  
32  
33  
34

1  
2  
3  
4  
5  
6  
7  
8  
9  
10  
11  
12  
13  
14  
15  
16  
17  
18  
19  
20  
21  
22  
23  
24  
25  
26  
27  
28  
29  
30  
31  
32  
33  
34  
35  
36  
37  
38  
39  
40  
41  
42  
43  
44  
45  
46



**c**



# BMJ Open

## Assessing the accuracy of health facility typology in representing the availability of health services: a case study in Mali

|                                 |                                                                                                                                                                                                                                                                                                                                                                                                                                                                                                                                                                                                                                                                                                                                                                                                                                                                                                                                                                                                                                                                                                                                                                                |
|---------------------------------|--------------------------------------------------------------------------------------------------------------------------------------------------------------------------------------------------------------------------------------------------------------------------------------------------------------------------------------------------------------------------------------------------------------------------------------------------------------------------------------------------------------------------------------------------------------------------------------------------------------------------------------------------------------------------------------------------------------------------------------------------------------------------------------------------------------------------------------------------------------------------------------------------------------------------------------------------------------------------------------------------------------------------------------------------------------------------------------------------------------------------------------------------------------------------------|
| Journal:                        | <i>BMJ Open</i>                                                                                                                                                                                                                                                                                                                                                                                                                                                                                                                                                                                                                                                                                                                                                                                                                                                                                                                                                                                                                                                                                                                                                                |
| Manuscript ID                   | bmjopen-2023-077127.R2                                                                                                                                                                                                                                                                                                                                                                                                                                                                                                                                                                                                                                                                                                                                                                                                                                                                                                                                                                                                                                                                                                                                                         |
| Article Type:                   | Original research                                                                                                                                                                                                                                                                                                                                                                                                                                                                                                                                                                                                                                                                                                                                                                                                                                                                                                                                                                                                                                                                                                                                                              |
| Date Submitted by the Author:   | 29-Jan-2024                                                                                                                                                                                                                                                                                                                                                                                                                                                                                                                                                                                                                                                                                                                                                                                                                                                                                                                                                                                                                                                                                                                                                                    |
| Complete List of Authors:       | <p>Petragallo, Samuel; World Health Organization, Health Resources and Services Availability Monitoring System (HeRAMS) Initiative</p> <p>Timoner, Pablo; University of Geneva, Geohealth group, Institute of Global Health; University of Geneva, Institute for Environmental Sciences</p> <p>Hierink, Fleur; University of Geneva, Geohealth group, Institute of Global Health; University of Geneva, Institute for Environmental Sciences</p> <p>Fuhrer, Caroline; World Health Organization, Health Resources and Services Availability Monitoring System (HeRAMS) Initiative</p> <p>Toure, Ousmane; World Health Organization Mali, Health Resources and Services Availability Monitoring System (HeRAMS) Initiative</p> <p>Iknane, Akory; University of Sciences, Technics and Technology</p> <p>Coulibaly, Youssouf; Ministry of Health and Social Development, General Directorate of Public Health and Hygiene of Ministry</p> <p>FALL , Ibrahima-Soce ; World Health Organization, Health Emergencies Program</p> <p>Ray, Nicolas; University of Geneva, Geohealth group, Institute of Global Health; University of Geneva, Institute for Environmental Sciences</p> |
| <b>Primary Subject Heading</b>: | Health services research                                                                                                                                                                                                                                                                                                                                                                                                                                                                                                                                                                                                                                                                                                                                                                                                                                                                                                                                                                                                                                                                                                                                                       |
| Secondary Subject Heading:      | Public health                                                                                                                                                                                                                                                                                                                                                                                                                                                                                                                                                                                                                                                                                                                                                                                                                                                                                                                                                                                                                                                                                                                                                                  |
| Keywords:                       | Health Services Accessibility, Health policy < HEALTH SERVICES ADMINISTRATION & MANAGEMENT, Organisation of health services < HEALTH SERVICES ADMINISTRATION & MANAGEMENT, Geographical mapping < TROPICAL MEDICINE                                                                                                                                                                                                                                                                                                                                                                                                                                                                                                                                                                                                                                                                                                                                                                                                                                                                                                                                                            |
|                                 |                                                                                                                                                                                                                                                                                                                                                                                                                                                                                                                                                                                                                                                                                                                                                                                                                                                                                                                                                                                                                                                                                                                                                                                |

SCHOLARONE™  
Manuscripts



I, the Submitting Author has the right to grant and does grant on behalf of all authors of the Work (as defined in the below author licence), an exclusive licence and/or a non-exclusive licence for contributions from authors who are: i) UK Crown employees; ii) where BMJ has agreed a CC-BY licence shall apply, and/or iii) in accordance with the terms applicable for US Federal Government officers or employees acting as part of their official duties; on a worldwide, perpetual, irrevocable, royalty-free basis to BMJ Publishing Group Ltd ("BMJ") its licensees and where the relevant Journal is co-owned by BMJ to the co-owners of the Journal, to publish the Work in this journal and any other BMJ products and to exploit all rights, as set out in our [licence](#).

The Submitting Author accepts and understands that any supply made under these terms is made by BMJ to the Submitting Author unless you are acting as an employee on behalf of your employer or a postgraduate student of an affiliated institution which is paying any applicable article publishing charge ("APC") for Open Access articles. Where the Submitting Author wishes to make the Work available on an Open Access basis (and intends to pay the relevant APC), the terms of reuse of such Open Access shall be governed by a Creative Commons licence – details of these licences and which [Creative Commons](#) licence will apply to this Work are set out in our licence referred to above.

Other than as permitted in any relevant BMJ Author's Self Archiving Policies, I confirm this Work has not been accepted for publication elsewhere, is not being considered for publication elsewhere and does not duplicate material already published. I confirm all authors consent to publication of this Work and authorise the granting of this licence.

## Assessing the accuracy of health facility typology in representing the availability of health services: a case study in Mali

Samuel Petragallo\*<sup>1</sup> (petragallos@who.int), Pablo Timoner\*<sup>2,3</sup> (Pablo.Timoner@unige.ch), Fleur Hierink\*<sup>2,3</sup> (Fleur.Hierink@unige.ch), Caroline Fuhrer<sup>1</sup> (fuhrerc@who.int), Ousmane Toure<sup>4</sup> (toureo@who.int), Akory Iknane<sup>5</sup> (akoryagiknane@gmail.com), Youssouf Coulibaly<sup>6</sup> (youssoufcsseware@yahoo.fr), Ibrahima Socé Fall<sup>7</sup> (socef@who.int), Nicolas Ray<sup>2,3</sup> (Nicolas.Ray@unige.ch)

\*Contributed equally

Corresponding author: Fleur Hierink, (fleur.hierink@unige.ch)

1. Health Resources and Services Availability Monitoring System (HeRAMS) Initiative, World Health Organization Headquarters. Avenue Appia 20, 1211 Geneva, Switzerland.
2. GeoHealth group, Institute of Global Health, Faculty of Medicine, University of Geneva. 9 Chemin des Mines, 1202 Geneva, Switzerland.
3. Institute for Environmental Sciences, University of Geneva. Boulevard Carl-Vogt 66, 1205 Geneva, Switzerland.
4. Health Resources and Services Availability Monitoring System (HeRAMS), World Health Organization, Quartier Ntomiboro- Bougou, B.P. 99, Bamako, Mali.
5. University of Sciences, Technics and Technology, J287+PM5, Bamako, Mali.
6. General Directorate of Public Health and Hygiene of Ministry of Health and Social Development, BP 232 Koulouba, Bamako, Mali.



1  
2  
3 7. Assistant Director General, Health Emergencies Program, World Health Organization,  
4  
5 Headquarters. Avenue Appia 20, 1211 Geneva, Switzerland.  
6  
7  
8  
9

10 **Keywords:** health facility typology, health service availability, health system assessments, health  
11  
12 system policy  
13

14 **Word count:** 2413 words  
15  
16  
17  
18  
19  
20  
21  
22  
23  
24  
25  
26  
27  
28  
29  
30  
31  
32  
33  
34  
35  
36  
37  
38  
39  
40  
41  
42  
43  
44  
45  
46  
47  
48  
49  
50  
51  
52  
53  
54  
55  
56  
57  
58  
59  
60

For peer review only

## Abstract

**Introduction:** Using health facility types as a measure of service availability is a common approach in international standards for health system policy and planning. However, this proxy may not accurately reflect the actual availability of specific health services.

**Objective:** This study aims to evaluate the reliability of health facility typology as an indicator of specific health service availability and explore whether certain facility types consistently provide particular services.

**Design:** We analyzed a comprehensive dataset containing information from 1,725 health facilities in Mali. To uncover and visualize patterns within the dataset, we utilized two analytical techniques: Multiple Correspondence Analysis and Between-Class Analysis. These analyses allowed us to quantitatively measure the influence of health facility types on the variation in health service provisioning. Additionally, we developed and calculated a Consistency Index, which assesses the consistency of a health facility type in providing specific health services. By examining various health facilities and services, we sought to determine the accuracy of facility types as indicators of service availability.

**Setting:** The study focused on the health system in Mali as a case study.

**Results:** Our findings indicate that using health facility types as a proxy for service availability in Mali is not an accurate representation. We observed that most of the variation in service provision does not stem from differences between facility types but rather within facility types. This suggests that relying solely on health facility typology may lead to an incomplete understanding of health service availability.

**Conclusions:** These results have significant implications for health policy and planning. The reliance on health facility types as indicators for health system policy and planning should be reconsidered. A more nuanced and evidence-based understanding of health service availability is crucial for effective health policy and planning, as well as for the assessment and monitoring of health systems.

### Strengths and limitations of this study

- The study benefits from a comprehensive dataset of 1,725 health facilities in Mali, contributing to a strong foundation for the analysis.
- By employing Multiple Correspondence Analysis, Between-Class Analysis, and constructing a consistency index, diverse analytical methods are used to explore underlying structures and compare service consistency across different facility types.
- The study investigates potential geospatial patterns in the relationship between health facility typology and health service availability.
- The findings are context-specific to the healthcare system in Mali, further research should validate whether similar patterns exist in other countries.

## 1 Introduction

2 Universal health coverage aims to ensure that everyone can access the necessary health services they  
3 require, regardless of time, place, or financial constraints[1,2]. Understanding the geographical  
4 distribution of health services is crucial in identifying areas where access to health services may be  
5 limited[3,4]. Policymakers and practitioners have often used the distribution of specific types of health  
6 facilities relative to the population to address this issue. Health facility types are often grouped into  
7 different categories, such as health posts, health centers, clinics and district hospitals[3]. These  
8 classifications can vary depending on the country or context. Studies have used information on health  
9 facility typology to assess the geographical accessibility of different health services. However, there  
10 are inconsistencies in how these types are defined and categorized in different studies. For example,  
11 Ouma et al. (2018)[5] assumed that emergency care is available at all hospitals, while Hullah et al.  
12 (2019)[6] manually reclassified health facility types into self-defined categories, assuming distinct  
13 capabilities for different types. Additionally, Weiss et al. (2020)[7] selected specific facility types, such  
14 as hospitals and clinics, in different facility datasets without a common definition. According to  
15 guidelines for facility coverage, set by the Sphere Project in 2018[8] and the Global Health Cluster in  
16 2021[9], one health facility should be available for every 10,000 people regardless of the type and one  
17 district or rural hospital should be available for every 250,000 people in a given administrative area.  
18 However, little is known about the relationship between facility type and the effective availability of  
19 essential health services at the health facility level[3], as health facility datasets typically do not include  
20 information on the type of services effectively provided by a facility[7,10]. Relatively few studies have  
21 examined the influence of facility type on the availability of specific health services[11,12] but to our  
22 knowledge no analysis of multiple essential services has yet measured the extent of this relationship  
23 more broadly.

24  
25 The World Health Organization's (WHO) Health Resources and Services Availability Monitoring System  
26 (HeRAMS) gathers and presents core information on essential health resources and services[13]. This  
27 information is crucial for decision makers at national, regional and global levels. The initiative supports  
28 countries in standardizing and continuously collecting, analyzing, and disseminating information on  
29 essential health resources and services[13]. It provides a standardized process for the production and  
30 maintenance of an authoritative master facility list that includes core information on the availability  
31 of essential health services. Information gathered on healthcare institutions is compiled and verified  
32 by local service providers[3,14].

1  
2  
3 34 The HeRAMS Initiative provides an opportunity to clarify how accurately the typology of health  
4 35 facilities reflects the availability of specific health services and whether health facility types are a good  
5 36 indicator for assessing the distribution of and accessibility to health services. In Mali, HeRAMS has  
6 37 been operational since 2013. It currently provides regular information on 2,676 health facilities. A  
7 38 comprehensive report on the exhaustive mapping of health facilities in Mali was published in  
8 39 2020[15], with an update published in October 2022[16]. As a result, Mali is now one of the countries  
9 40 where the accuracy of the typology of health facilities can be effectively assessed in relation to the  
10 41 availability of health services. Therefore, this study aims to analyze the accuracy of health facility types  
11 42 in representing health service availability using the most recent HeRAMS data for Mali. We assess  
12 43 whether the typology of a health facility explains the availability of a large set of health services at the  
13 44 facility level. The results can help to guide decision- and policymakers in redirecting health system  
14 45 assessments and surveillance strategies towards the most meaningful information and indicators and  
15 46 ultimately improve populations' access to healthcare.  
16  
17  
18  
19  
20  
21  
22  
23  
24  
25  
26  
27  
28  
29

## 30 48 **2. Methods**

### 31 50 **2.1 Data collection**

32 51 Mali health facility data were extracted from the HeRAMS database and included up-to-date  
33 52 information on essential health service provisioning at the facility level (as of October 4, 2022). For  
34 53 this study, we only focused on public health facilities that constitute the backbone of the three-level  
35 54 pyramidal health system in Mali, namely the Community Health Centers (CHCs), the Reference Health  
36 55 Centers (RHCs), and the Hospitals (Hs), giving us a total of 1,725 observations. CHCs, RHCs and Hs  
37 56 represented 95% (n = 1646), 4% (n = 66) and 1% (n = 13) of the facilities, respectively. All essential  
38 57 health services reported in the HeRAMS database (n = 92) were considered, and the response for each  
39 58 service in each health facility could be "Available", "Partially available", "Not available" or "Not  
40 59 normally provided". If a service is available, it is considered that a health service provider is able to  
41 60 provide the service without limitations or barriers. A partially available service is considered not fully  
42 61 available because the health service provider encounters obstacles or limitations in providing the  
43 62 service, such as financial constraints or insufficient equipment. An unavailable service is a service that  
44 63 should normally be provided but cannot currently be provided because of lack of human resources,  
45 64 medical supplies, financial constraints or other impeding factors. If a service is not normally provided,  
46 65 it means that the service is not available but also that it is not part of the package of services normally  
47 66 provided by the health service provider. Our study did not require ethical approval from a research  
48 67 commission since the data collected did not involve any individual or patient-specific information.  
49  
50  
51  
52  
53  
54  
55  
56  
57  
58  
59  
60

68 Instead, it primarily consisted of data at the health facility level regarding service provision. As a result,  
69 no ethical clearance was necessary for this data collection.

70

## 71 **2.2 Patient and Public Involvement**

72 This study did not involve specific patient or public involvement due to its focus on analyzing health-  
73 facility level data and exploring broader geographical patterns regarding the representativeness of  
74 health facility typology in healthcare service availability.

75

## 76 **2.3 Statistical analysis**

77 In our study, we investigated the connection between different types of health facilities and the  
78 availability of essential health services. To simplify our analysis, we categorized the responses from  
79 HeRAMS into two groups: "Available" and "Not available". We combined the responses of "Available"  
80 and "Partially available" into the "Available" category, while grouping "Not available" and "Not  
81 normally provided" as "Not available".

82

83 To understand the underlying patterns in the data and determine the percentage of variance in health  
84 service provisioning explained by health facility types, we employed two statistical techniques. Firstly,  
85 we conducted a Multiple Correspondence Analysis (MCA), which is similar to Principal Component  
86 Analysis (PCA), but specifically designed for categorical data[17]. Next, we performed a Between-Class  
87 Analysis (BCA), which is a variant of PCA that incorporates instrumental variables (PCAIV), in which  
88 there is only a single factor as explanatory variable[18].

89

90 The ratio of BCA inertia to MCA inertia indicates the proportion of variance explained by the different  
91 health facility types. We assessed the significance of this percentage through a Monte-Carlo procedure  
92 involving 999 permutations.

93

## 94 **2.4 Consistency index**

95 We also developed and calculated a Consistency Index (CI) to measure the consistency of health facility  
96 types in providing specific essential health services. The formula for CI is:

$$97 \quad CI = \frac{|a - b|}{a + b}$$

98 Here, CI represents the Consistency Index, and 'a' and 'b' are the counts of observations for the two  
99 possible responses, namely "available" or "not available". For example, 'a' could represent the number  
100 of responses indicating "available" while 'b' represents the number of responses indicating "not

1  
2  
3 101 available". The CI values range from 0 (indicating low consistency) to 1 (indicating high consistency).  
4  
5 102 We calculate the CI for each individual service within a particular type of health facility.

6 103  
7  
8 104 Since HeRAMS covers 92 services and our focus is on three types of health care providers, the CI values  
9  
10 105 follow a specific distribution. We tested the differences in CI values between the three facility types  
11  
12 106 using Wilcoxon tests and employed the Holm procedure to control the family-wise error rate.  
13  
14 107 Additionally, we assessed how the CI varies among the five essential health service pillars, which  
15  
16 108 include general clinical and emergency care services, child health and nutrition, communicable  
17  
18 109 diseases, sexual and reproductive health, and noncommunicable diseases.

19 110  
20 111 Finally, focusing on the most frequent health facility type only (i.e, CHC), we analyzed how the health  
21  
22 112 service availability varied across the ten Malian regions (i.e, Gao, Kayes, Kidal, Koulikoro, Ménaka,  
23  
24 113 Mopti, Ségou, Sikasso, Taoudénit, and Tombouctou) and the capital district Bamako. We calculated  
25  
26 114 the average probability of an essential health service being available in each region.

### 27 115 28 116 **3. Results**

#### 29 117 **3.1 Rethinking Health Facility Types as Indicators of Service Availability**

30 118 Only a small portion of service availability can be attributed to health facility types, as demonstrated  
31  
32 119 in Figure 1. The BCA reveals that health facility types explain merely 6.3% of the variance in service  
33  
34 120 availability ( $p = 0.001$ ). This indicates that the majority of variability in health service provisioning  
35  
36 121 stems from differences within facility types rather than between them.

#### 37 122 38 39 123 **3.2 Examining Consistency in Health Facility Types for Service Provision**

40 124 To avoid making broad generalizations about all facilities, it is important to recognize that some types  
41  
42 125 of facilities may have a greater level of consistency in providing certain services as compared to others.  
43  
44 126 To account for this variation, we created a Consistency Index. Our analysis revealed that service  
45  
46 127 availability or non-availability is most consistent within CHCs ( $p < 0.001$ ). However, significant  
47  
48 128 variability between services remains pronounced within each facility type (Figure 2a). For Hs and RHCs,  
49  
50 129 the median CI values are relatively low, close to 0.5. This indicates that, on average, approximately  
51  
52 130 one quarter of health facilities have a service provisioning pattern that differs from the other three  
53  
54 131 quarters of facilities. Although service provisioning patterns show greater similarity among CHCs, the  
55  
56 132 conclusion remains unchanged that health facility types are not a reliable indicator of health service  
57  
58 133 availability.

59 134  
60

### 135 **3.3 Some essential health services are more consistently provided than others**

136 In order to gain a comprehensive understanding of service availability, we delved deeper into the  
137 consistency of service provision across various essential health services at the different facility types.  
138 Our analysis revealed distinct variations in patterns, indicating that different sets of essential health  
139 services and facility types exhibit diverse levels of consistency (Figure 2b). Notably, when examining  
140 the delivery of sexual and reproductive health services in Hs, we observed high inconsistency (median  
141 = 0.23), suggesting a lack of clear patterns regarding the availability of these services. Conversely, in  
142 CHCs, the availability of general clinical services and emergency care demonstrated a high level of  
143 consistency (median = 0.83). These findings reveal that the consistency of service provisioning differs  
144 among facility types across various service pillars, suggesting that health facility type can only serve as  
145 a reliable proxy for health service availability in very few specific instances. Moreover, even seemingly  
146 straightforward assumptions, such as the availability of maternal health services in Hs, cannot be  
147 universally assumed, as previously suggested by Wigley et al. (2020)[19].

148

149 Furthermore, to account for potential spatial variations in service availability, we conducted a  
150 comparison of service consistency among CHCs across the different regions of Mali. The results  
151 revealed substantial differences in service availability between regions (Figure 2c). Southern regions,  
152 including Bamako, Kayes, Koulikoro, Mopti, Ségou, and Sikasso, exhibited a higher probability of  
153 having essential health services available (median = 0.47), while the availability was notably low in  
154 Ménaka (0.21).

155

### 156 **Discussion**

157 This study reveals that it is misleading to rely solely on the typology of health facilities as a proxy of  
158 the availability of health services. Yet, health system performance indicators such as availability and  
159 accessibility are often presented by type of health facility[5,8,9,19], as if there is a common agreement  
160 on the service packages that a particular type of facility should offer. This indicates that when  
161 conducting research and making policy decisions, relying on assumptions about the delivery of specific  
162 services across certain health facility types, like emergency obstetric care in all hospitals, can lead to  
163 incorrect conclusions. Instead, it is more appropriate to consider the actual availability of the service  
164 at the facility level, rather than relying solely on the type of facility. Additionally, certain policy  
165 documents and guidelines[8,9,20], particularly in the area of emergencies, still use typology and  
166 service availability of services interchangeably and do not address the limitations and challenges of  
167 using such indicators. Our research shows that they are not as closely linked as previously thought and  
168 that their use for health system planning and monitoring should be reconsidered.



1  
2  
3 169  
4  
5 170 One key health indicator often used in health system planning or monitoring is the average population  
6 171 per functioning health facility by type and by administrative unit. The Sphere handbook discusses the  
7  
8 172 need to consider combinations of types and to adjust coverage thresholds according to context[8],  
9  
10 173 while the Global Health Cluster Guidance points out that this indicator is recommended as a proxy for  
11 174 geographic accessibility and equity of health facility availability across administrative units[9]. In both  
12  
13 175 cases, there is no discussion of the importance or value of the accessibility of health facilities in the  
14  
15 176 absence of information on the services they actually provide. Similarly the Humanitarian Indicators  
16 177 Registry[20] also does not discuss this indicator inadequacy to represent the availability of and  
17  
18 178 accessibility to essential health services but rather its incompleteness on other secondary dimensions,  
19  
20 179 for example service quality.

21 180  
22  
23 181 The results also showed that the consistency of service provisioning between different facility types  
24  
25 182 varies across different service pillars, indicating that health facility type may represent a good proxy  
26  
27 183 for health service availability, but only in very few specific cases. Taking into account the most frequent  
28  
29 184 health facility type, which occurred to be also the most consistent type in terms of service provisioning  
30 185 (i.e., CHC), service availability largely differs from one region to another. This could be indirectly  
31  
32 186 explained by political and security contexts and stresses the importance of assessing the service  
33  
34 187 availability at the facility level and avoiding false assumptions.

35 188  
36  
37 189 In addition to being poor proxies of the availability of and accessibility to essential health services,  
38  
39 190 indicators based on geolocation and health facility type may suffer from other limitations due to the  
40  
41 191 availability and quality of the data to support them. These limitations include the persistence of large  
42  
43 192 differences in typology between different health facility datasets within a country. South et al.  
44  
45 193 (2021)[3] showed that even though the total number of facilities captured by different datasets within  
46  
47 194 a country can be quite similar, the geographical distribution of the facility types is extremely different.  
48  
49 195 Other limitations should be expected from the lack of information on the functionality of these  
50  
51 196 facilities and their ability to actually deliver certain services. This limitation can be particularly acute  
52  
53 197 in emergency settings where health facilities often face major disruptions.

52 198

53 199

## 55 200 **Conclusion**

56  
57 201 For all these reasons, indicators based on geolocation and health facility type are not efficient proxies  
58  
59 202 for assessing the availability and accessibility of essential health services. The results observed in Mali



1  
2  
3 203 suggest that relying on such indicators could lead to misleading interpretations of needs, gaps, and  
4  
5 204 priorities, which are crucial for decision makers striving to ensure equitable access to healthcare  
6  
7 205 services in line with Sustainable Development Goal 3. Consequently, there is a need to redefine the  
8  
9 206 nature and scope of health system assessments and monitoring. Instead of focusing solely on the  
10  
11 207 availability of certain types of health facilities, assessments should explicitly prioritize evaluating  
12  
13 208 service availability.

14 209

15 210 Other studies have examined the influence of facility type on the availability of specific health  
16  
17 211 services[11,12] but this study is the first to focus on a wide range of essential health services. This  
18  
19 212 case study was carried out in Mali and further research is needed to generalize our findings,  
20  
21 213 however it is expected that similar patterns exist in other settings and countries.

22 214

### 23 215 **Author Contributions**

24  
25 216 The study was initially conceptualized by SP and further supported by PT. The methodology was  
26  
27 217 initially developed by PT and reviewed by FH, NR and SP. Data analysis and processing were done by  
28  
29 218 PT. Writing of the original draft was done by FH, PT and SP supported by NR. Initial reviews on the  
30  
31 219 figures were given by FH, SP, and NR. Initial reviews on the text were given by OT and CF. AI, YC, ISF  
32  
33 220 have further assisted in thoroughly reviewing all figures and texts.

34 221

### 35 222 **Funding statement**

36  
37 223 This research received no specific grant from any funding agency in the public, commercial or not-  
38  
39 224 for-profit sectors.

40 225

### 41 226 **Ethics statement**

42  
43 227 Our study did not require ethical approval from a research commission since the data collected did  
44  
45 228 not involve any individual or patient-specific information. Instead, it primarily consisted of data at  
46  
47 229 the health facility level regarding service provision. As a result, no ethical clearance was necessary  
48  
49 230 for this data collection.

50 231

### 51 232 **Data and code sharing**

52  
53 233 The health facility data used in this study can be obtained upon reasonable request from HeRAMS.  
54  
55 234 Additionally, the statistical code required to replicate the data analysis will be accessible through a  
56  
57 235 dedicated Zenodo repository upon publication.

58 236

59  
60

1  
2  
3 **237 Conflicts of interest**

4  
5 **238** The authors have no conflicts of interest to declare.  
6  
7  
8  
9  
10  
11  
12  
13  
14  
15  
16  
17  
18  
19  
20  
21  
22  
23  
24  
25  
26  
27  
28  
29  
30  
31  
32  
33  
34  
35  
36  
37  
38  
39  
40  
41  
42  
43  
44  
45  
46  
47  
48  
49  
50  
51  
52  
53  
54  
55  
56  
57  
58  
59  
60

For peer review only

## References

- 1 Kienny MP, Bekedam H, Dovlo D, *et al.* Strengthening health systems for universal health coverage and sustainable development. *Bulletin of the World Health Organization*. 2017;**95**:537–9. doi:<http://dx.doi.org/10.2471/BLT.16.187476>
- 2 Wagstaff A, Neelsen S. A comprehensive assessment of universal health coverage in 111 countries: a retrospective observational study. *The Lancet Global Health* 2020;**8**:e39–49. doi:10.1016/S2214-109X(19)30463-2
- 3 South A, Dicko A, Herringer M, *et al.* A reproducible picture of open access health facility data in Africa and R tools to support improvement [version 2; peer review: 3 approved, 1 approved with reservations]. *Wellcome Open Research* 2021;**5**. doi:10.12688/wellcomeopenres.16075.2
- 4 World Health Organization. *Transforming health services delivery towards people-centred health systems*. WHO Regional Office for Europe 2014. <https://apps.who.int/iris/handle/10665/136409> (accessed 2 Nov 2022).
- 5 Ouma PO, Maina J, Thurania PN, *et al.* Access to emergency hospital care provided by the public sector in sub-Saharan Africa in 2015: a geocoded inventory and spatial analysis. *The Lancet Global Health* 2018;**6**:e342–50.
- 6 Hulland EN, Wiens KE, Shirude S, *et al.* Travel time to health facilities in areas of outbreak potential: maps for guiding local preparedness and response. *BMC Medicine* 2019;**17**:232. doi:10.1186/s12916-019-1459-6
- 7 Weiss D, Nelson A, Vargas-Ruiz C, *et al.* Global maps of travel time to healthcare facilities. *Nature Medicine* 2020;**26**:1835–8.
- 8 Sphere Project, editor. *The sphere handbook: humanitarian charter and minimum standards in humanitarian response*. Fourth edition. Geneva, Switzerland: : Sphere Association 2018.
- 9 Global Health Cluster. GHC Guidance: People in Need Calculations Version 2.0. 2021. [https://healthcluster.who.int/docs/librariesprovider16/meeting-reports/ghc-pin-severityguidance-v2.0.pdf?Status=Master&sfvrsn=85ffa08e\\_9](https://healthcluster.who.int/docs/librariesprovider16/meeting-reports/ghc-pin-severityguidance-v2.0.pdf?Status=Master&sfvrsn=85ffa08e_9) (accessed 13 Jan 2023).
- 10 Maina J, Ouma PO, Macharia PM, *et al.* A spatial database of health facilities managed by the public health sector in sub Saharan Africa. *Scientific data* 2019;**6**:1–8.
- 11 Kim ET, Singh K, Speizer IS, *et al.* Influences of health facility type for delivery and experience of cesarean section on maternal and newborn postnatal care between birth and facility discharge in Malawi. *BMC Health Services Research* 2020;**20**:139. doi:10.1186/s12913-020-4958-4
- 12 Seiglie JA, Serván-Mori E, Begum T, *et al.* Predictors of health facility readiness for diabetes service delivery in low- and middle-income countries: The case of Bangladesh. *Diabetes Research and Clinical Practice* 2020;**169**. doi:10.1016/j.diabres.2020.108417
- 13 World Health Organization. HeRAMS Strategic Framework. 2022. <https://www.who.int/publications/m/item/herams-strategic-framework>
- 14 World Health Organization. *Health resources and services availability monitoring system (HeRAMS): external evaluation report, July 2019*. Geneva: : World Health Organization 2021. <https://apps.who.int/iris/handle/10665/339850>

- 1  
2  
3 15 World Health Organization. HeRAMS Mali Baseline Report 2020. 2021.  
4 <https://www.who.int/publications/m/item/herams-mali-baseline-report-2020> (accessed 2 Nov  
5 2022).  
6  
7  
8 16 World Health Organization. HeRAMS Mali Status Update Report April 2022: Operational status  
9 of the health system. 2022. [https://www.who.int/publications/m/item/herams-mali-status-](https://www.who.int/publications/m/item/herams-mali-status-update-report-2022-04-operational-status-of-the-health-system)  
10 [update-report-2022-04-operational-status-of-the-health-system](https://www.who.int/publications/m/item/herams-mali-status-update-report-2022-04-operational-status-of-the-health-system) (accessed 2 Nov 2022).  
11  
12 17 Bartholomew DJ, editor. *The analysis and interpretation of multivariate data for social scientists*.  
13 Boca Raton, Fla: : Chapman & Hall/CRC 2002.  
14  
15 18 Dray S, Jombart T. Revisiting Guerry's data: Introducing spatial constraints in multivariate  
16 analysis. *Ann Appl Stat* 2011;**5**. doi:10.1214/10-AOAS356  
17  
18 19 Wigley AS, Tejedor-Garavito N, Alegana V, *et al*. Measuring the availability and geographical  
19 accessibility of maternal health services across sub-Saharan Africa. *BMC Medicine* 2020;**18**:237.  
20 doi:10.1186/s12916-020-01707-6  
21  
22 20 Inter-Agency Standing Committee, Global Health Cluster. The humanitarian indicator registry.  
23 2023.<https://ir.hpc.tools/applications/ir/indicator/h-a1a>  
24  
25  
26  
27  
28  
29  
30  
31  
32  
33  
34  
35  
36  
37  
38  
39  
40  
41  
42  
43  
44  
45  
46  
47  
48  
49  
50  
51  
52  
53  
54  
55  
56  
57  
58  
59  
60

## Figure legends

**Figure 1. Multiple Correspondence Analysis (MCA) biplots of health facilities based on service availability.** The figure shows the relationships between health facilities based on service availability. The points in this two-dimensional graph represent the health facilities. Closer points indicate more similarities in terms of service availability. Different types of health facilities are represented by different colors. The colored ellipses surrounding the points assume multivariate t-distributions. Each ellipse represents a different type of health facility, providing a visual representation of where most facilities of that type fall on the plot, thus capturing the multivariate dispersion of that group. The two axes of the graph depict the dimensions that account for the most variance in the data, with their labels indicating the proportion of the total variance explained by that axis. This means they represent the main patterns of differences in service availability between the health facilities.

**Figure 2. Violin and box plots of the Consistency Index (CI) values for each health facility type, based on service availability and map indicating service availability at the regional level in Mali.** A) The violin plots show the distribution of the CI values taking into account all the essential health services, and the box plots show the median (horizontal line) and the interquartile range (IQR, box outline). The whiskers extend from the hinge to the highest and lowest value that are within 1.5\*IQR of the hinge. B) CI values for each health facility type and essential health service pillar, based on service availability. Q1: general clinical and emergency care services; Q2: child health and nutrition; Q3: communicable diseases; Q4: sexual and reproductive health; Q5: noncommunicable diseases. C) The mean probability by region for an essential health service to be available at a Community Health Center.

BMJ Open



1  
2  
3  
4  
5  
6  
7  
8  
9  
10  
11  
12  
13  
14  
15  
16  
17  
18  
19  
20  
21  
22  
23  
24  
25  
26  
27  
28  
29  
30  
31  
32  
33  
34  
35  
36  
37  
38  
39  
40  
41  
42  
43  
44  
45  
46



**c**



Supplement: bmjopen-2023-077127.draft_revisions.pdf [file bmjopen-2023-077127.draft_revisions.pdf]
